# Supplementary material for: RNA m5C oxidation by TET2 regulates chromatin state and leukaemogenesis
Source: Springer Nature journal article supplement (doi:10.1038/s41586-024-07969-x), 2024-10-02
Supplement: MOESM1 [file 41586_2024_7969_MOESM1_ESM.pdf › 41586_2024_7969_MOESM1_ESM.pdf]

---

## Supplementary information

---

# RNA m<sup>5</sup>C oxidation by TET2 regulates chromatin state and leukaemogenesis

---

In the format provided by the  
authors and unedited

## **RNA m<sup>5</sup>C oxidation by TET2 regulates chromatin state and leukemogenesis**

Zhongyu Zou<sup>1,2,7</sup>, Xiaoyang Dou<sup>1,2,7</sup>, Ying Li<sup>3,7</sup>, Zijie Zhang<sup>1,2</sup>, Juan Wang<sup>3</sup>, Boyang Gao<sup>2,4</sup>, Yu Xiao<sup>1,2</sup>, Yiding Wang<sup>2,4</sup>, Lijie Zhao<sup>1,2</sup>, Chenxi Sun<sup>1,2</sup>, Qinzhe Liu<sup>1,2</sup>, Xianbin Yu<sup>1,2</sup>, Hao Wang<sup>1,2</sup>, Juyeong Hong<sup>3</sup>, Qing Dai<sup>1,2</sup>, Feng-Chun Yang<sup>5,6</sup>, Mingjiang Xu<sup>3,6\*</sup>, and Chuan He<sup>1,2\*</sup>

### **SUPPLEMENTARY INFORMATION**

#### **Contents:**

Supplementary Figure 1: Uncropped scans with size marker indications

Supplementary Figure 2: Gating strategies for single-colour flow cytometry

Supplementary Figure 3: Gating strategies for multiple-colour flow cytometry

Supplementary Table 1: Summary of high-throughput sequencing samples. Antibodies and library sources were indicated.

Supplementary Table 2: Sequences of qPCR primers, siRNAs, oligo nucleotides, antisense oligos, and guide RNAs. Experiment type and references were indicated.

**Fig. 3e and Extended Data Fig. 6c**  
Flag as loading control

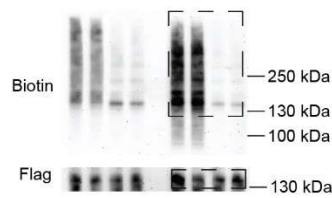

**Fig. 5b, GAPDH as loading control**

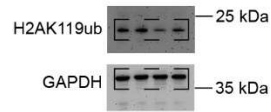

**Extended Data Fig. 1p**

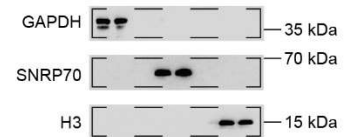

**Extended Data Fig. 2b, Alexa Fluor 488**  
as loading control

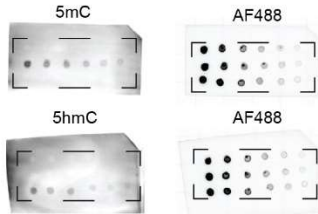

**Extended Data Fig. 6d**

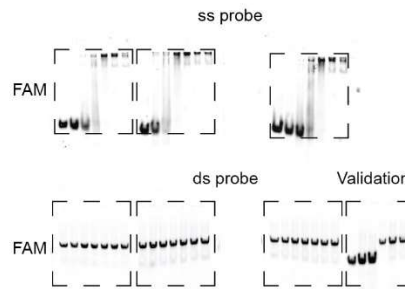

**Extended Data Fig. 6e**

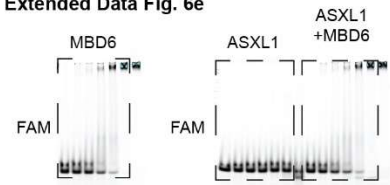

**Extended Data Fig. 6i**  
GAPDH as loading control

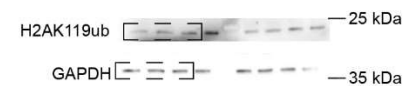

**Extended Data Fig. 9b,  $\beta$ -actin as sample processing control**

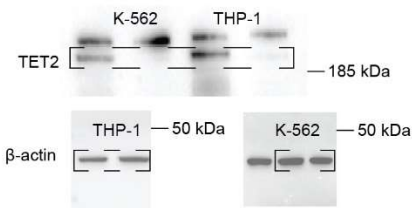

**Extended Data Fig. 10a**

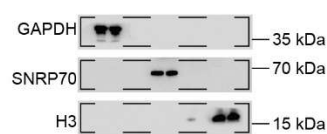

## Supplementary Figure 1 | Uncropped scans with size marker indications

Full scans of western blots and EMSA for the indicated figure panels. Dashed boxes indicate areas being cropped and displayed.

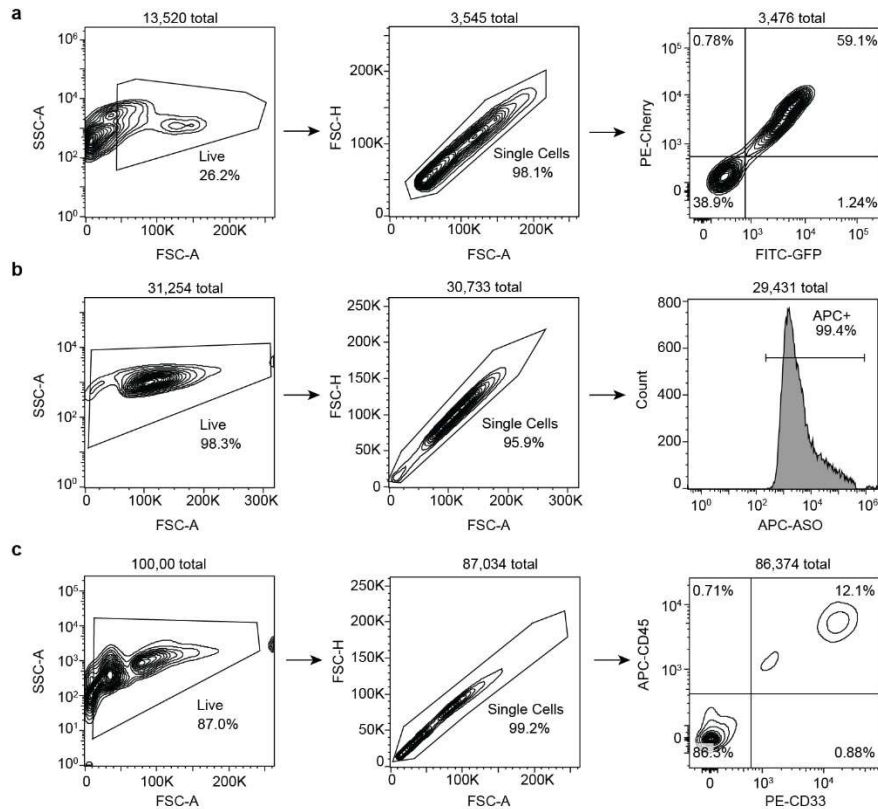

## Supplementary Figure 2 | Gating strategies for single-colour flow cytometry

**a**, Forward scatter (FSC-A) versus side scatter (SSC-A) was set to gate all live hematopoietic cells, but exclude small debris. All single cells are gated by FSC-H/FSC-A, but exclude cell clumps. PE and FITC are used to gate cherry and GFP labeling respectively. For Extended Data Fig. 8b.

**b**, Forward scatter (FSC-A) versus side scatter (SSC-A) was set to gate all live hematopoietic cells, but exclude small debris. All single cells are gated by FSC-H/FSC-A, but exclude cell clumps. APC is used to gate Cy5 labeled ASO. For Extended Data Fig. 8f.

**c**, Forward scatter (FSC-A) versus side scatter (SSC-A) was set to gate all live hematopoietic cells, but exclude small debris. All single cells are gated by FSC-H/FSC-A, but exclude cell clumps. Human leukemia donor cells are enriched by human CD45 or CD33. For Extended Data Fig. 9i.

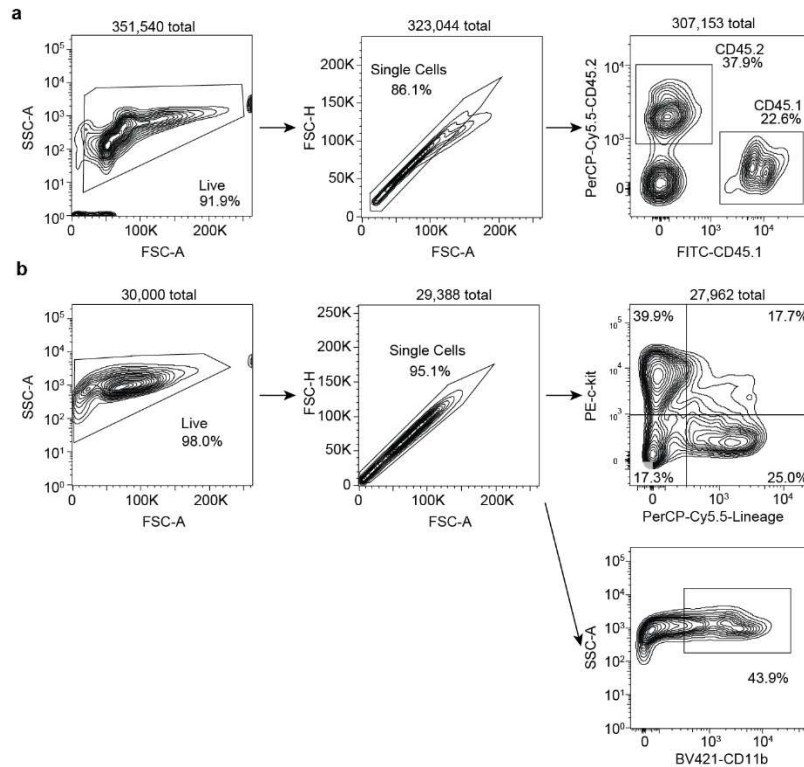

**Supplementary Figure 3 | Gating strategies for multiple-colour flow cytometry**

**a**, Forward scatter (FSC-A) versus side scatter (SSC-A) was set to gate all live hematopoietic cells, but exclude small debris. All single cells are gated by FSC-H/FSC-A, but exclude cell clumps. Donor cells are enriched by mouse CD45.2. For Fig. 4b,c.

**b**, Forward scatter (FSC-A) versus side scatter (SSC-A) was set to gate all live hematopoietic cells, but exclude small debris. All single cells are gated by FSC-H/FSC-A, but exclude cell clumps. Mouse HSPCs cells are enriched by Lin<sup>-</sup>c-kit<sup>+</sup> population. Myeloid cells are enriched by CD11b population. For Fig. 4g, Extended Data Fig. 7d,k, Extended Data Fig. 8d,e, h, i.
