# Supplementary material for: RNA m5C oxidation by TET2 regulates chromatin state and leukaemogenesis
Source: Nature. 2024 Oct 2;634(8035):986–94. doi: 10.1038/s41586-024-07969-x (PMC11499264; doi:10.1038/s41586-024-07969-x)
Supplement: Supplementary file 5 — Source Data Figs. 1–5 and Source Data Extended Data Figs. 1–9 [file 41586_2024_7969_MOESM5_ESM.xlsx]

## Sheet: Fig1
Fig. 1a: T1 denotes Tet1 KO, T2 denotes Tet2 KO, WT denotes WT								Fig. 1b: T1 denotes Tet1 KO, T2 denotes Tet2 KO, WT denotes WT									Fig.1c
ImageNumber	ObjectNumber	IntegratedIntensity/Area	Genotype	Wilcoxon test:				ImageNumber	ObjectNumber	Genotype	IntegratedIntensity/Area	Wilcoxon test:					Tet2 KO	Tet2 KO	Tet2 KO	Pspc1 KO	Pspc1 KO	Pspc1 KO
1	1	0.137213	T1	Tet1 KO vs WT: <2.2e-16				1	1	T1	0.0452073	Tet1 KO vs WT: <2.2e-16					OE FH	OE HXD	OE WT TET2	OE FH	OE HXD	OE WT TET2
1	2	0.143571	T1	Tet2 KO vs WT: <2.2e-16				1	2	T1	0.055243	Tet2 KO vs WT: <2.2e-16					0.103986	0.151045	0.063773	0.172146	0.163632	0.139374
1	3	0.168949	T1					1	3	T1	0.0206489						0.144764	0.185485	0.120221	0.114534	0.15561	0.169725
1	4	0.0928098	T1					1	4	T1	0.0677125						0.163737	0.163153	0.092822	0.172998	0.099297	0.182897
1	5	0.0633308	T1					1	5	T1	0.0650748						0.180763	0.144069	0.097371	0.225718	0.177594	0.174458
1	6	0.0726301	T1					1	6	T1	0.075489						0.147733	0.17261	0.081772	0.173108	0.185409	0.147479
1	7	0.178188	T1					1	7	T1	0.0844019
1	8	0.0932442	T1					1	8	T1	0.0827546						Tet2 KO OE WT TET2 vs Tet2 KO OE FH
1	9	0.141948	T1					1	9	T1	0.0831939						Unpaired t test with Welch's correction
1	10	0.0981228	T1					1	10	T1	0.0796819						P value				0.0034
1	11	0.122637	T1					1	11	T1	0.0910346						P value summary				**
1	12	0.0636167	T1					1	12	T1	0.0752543						Significantly different? (P < 0.05)				Yes
1	13	0.171625	T1					1	13	T1	0.043911						One- or two-tailed P value?				Two-tailed
1	14	0.0808473	T1					1	14	T1	0.0672334						Welch-corrected t, df				t=4.016 df=8.514
1	15	0.101212	T1					1	15	T1	0.0439447
1	16	0.125056	T1					1	16	T1	0.0909664
1	17	0.0994149	T1					1	17	T1	0.105221
1	18	0.0934818	T1					1	18	T1	0.0679143
1	19	0.15201	T1					1	19	T1	0.0345252
1	20	0.0907073	T1					1	20	T1	0.0301969
1	21	0.166724	T1					1	21	T1	0.0442145
1	22	0.116485	T1					1	22	T1	0.0973959
1	23	0.12366	T1					1	23	T1	0.044427
1	24	0.142967	T1					1	24	T1	0.0633171
1	25	0.153668	T1					1	25	T1	0.0677358
1	26	0.134219	T1					1	26	T1	0.090832
1	27	0.0804515	T1					1	27	T1	0.0842057
1	28	0.107086	T1					1	28	T1	0.0698268
1	29	0.089493	T1					1	29	T1	0.0750381
1	30	0.114054	T1					2	1	T1	0.0555659
1	31	0.122505	T1					2	2	T1	0.091765
1	32	0.110093	T1					2	3	T1	0.0916133
1	33	0.138102	T1					2	4	T1	0.100485
1	34	0.10234	T1					2	5	T1	0.05672
1	35	0.120506	T1					2	6	T1	0.115107
1	36	0.136649	T1					2	7	T1	0.0832605
1	37	0.145972	T1					2	8	T1	0.123526
1	38	0.0669086	T1					2	9	T1	0.0382828
1	39	0.0822172	T1					2	10	T1	0.0265955
1	40	0.130327	T1					2	11	T1	0.0168464
1	41	0.0894275	T1					2	12	T1	0.0921438
1	42	0.176006	T1					2	13	T1	0.109772
1	43	0.163582	T1					2	14	T1	0.0447847
1	44	0.211131	T1					2	15	T1	0.0695361
1	45	0.163691	T1					2	16	T1	0.0813414
1	46	0.0651794	T1					2	17	T1	0.0769224
1	47	0.146096	T1					2	18	T1	0.0180343
1	48	0.113654	T1					2	19	T1	0.13178
1	49	0.131063	T1					2	20	T1	0.111986
1	50	0.101842	T1					2	21	T1	0.102541
1	51	0.166116	T1					2	22	T1	0.109138
1	52	0.0657196	T1					2	23	T1	0.035121
1	53	0.0656891	T1					2	24	T1	0.0886206
1	54	0.11793	T1					2	25	T1	0.0626913
1	55	0.0806554	T1					2	26	T1	0.11284
1	56	0.1573	T1					2	27	T1	0.102236
1	57	0.0620181	T1					2	28	T1	0.0324673
1	58	0.178581	T1					2	29	T1	0.0683207
1	59	0.136548	T1					2	30	T1	0.0520076
1	60	0.0651174	T1					2	31	T1	0.0783554
1	61	0.0547755	T1					2	32	T1	0.105233
1	62	0.136975	T1					2	33	T1	0.0915849
1	63	0.139134	T1					2	34	T1	0.0957917
1	64	0.138316	T1					2	35	T1	0.0633951
1	65	0.189454	T1					2	36	T1	0.0477052
1	66	0.0638226	T1					2	37	T1	0.0882804
1	67	0.102511	T1					2	38	T1	0.0970261
1	68	0.0861348	T1					2	39	T1	0.0504872
1	69	0.119554	T1					2	40	T1	0.0528297
1	70	0.0720378	T1					2	41	T1	0.0386524
1	71	0.239114	T1					2	42	T1	0.0587581
1	72	0.191456	T1					2	43	T1	0.0310395
1	73	0.0622604	T1					2	44	T1	0.0164669
1	74	0.112091	T1					3	1	T1	0.0825947
1	75	0.0708226	T1					3	2	T1	0.0807204
1	76	0.0581131	T1					3	3	T1	0.10421
1	77	0.0725592	T1					3	4	T1	0.0675189
1	78	0.162856	T1					3	5	T1	0.0196612
1	79	0.0542692	T1					3	6	T1	0.0882336
1	80	0.0544558	T1					3	7	T1	0.0757509
1	81	0.0795457	T1					3	8	T1	0.0625938
1	82	0.1876	T1					3	9	T1	0.0727031
1	83	0.0773884	T1					3	10	T1	0.0979274
1	84	0.0829432	T1					3	11	T1	0.123956
1	85	0.0455539	T1					3	12	T1	0.0967222
1	86	0.055874	T1					3	13	T1	0.0914022
1	87	0.056996	T1					3	14	T1	0.0733148
1	88	0.0642649	T1					3	15	T1	0.10461
1	89	0.046574	T1					3	16	T1	0.090883
1	90	0.217636	T1					3	17	T1	0.0919107
1	91	0.124758	T1					3	18	T1	0.0819579
1	92	0.206471	T1					3	19	T1	0.120541
1	93	0.0590085	T1					3	20	T1	0.0170935
1	94	0.0392549	T1					3	21	T1	0.0802783
1	95	0.0409427	T1					3	22	T1	0.0915708
1	96	0.0807651	T1					3	23	T1	0.014553
1	97	0.177427	T1					3	24	T1	0.0610042
1	98	0.0417249	T1					4	1	T1	0.0434372
1	99	0.130999	T1					4	2	T1	0.0506887
1	100	0.0449696	T1					4	3	T1	0.055578
1	101	0.105101	T1					4	4	T1	0.0445335
1	102	0.0529436	T1					4	5	T1	0.058733
1	103	0.0671006	T1					4	6	T1	0.0621556
2	1	0.309774	T1					4	7	T1	0.0324789
2	2	0.0876201	T1					4	8	T1	0.0549205
2	3	0.0636537	T1					4	9	T1	0.0684578
2	4	0.126593	T1					4	10	T1	0.0613024
2	5	0.151902	T1					4	11	T1	0.0360961
2	6	0.0908402	T1					4	12	T1	0.043245
2	7	0.0795582	T1					4	13	T1	0.0620692
2	8	0.0858837	T1					4	14	T1	0.0501453
2	9	0.192296	T1					4	15	T1	0.063987
2	10	0.115212	T1					4	16	T1	0.045452
2	11	0.212342	T1					4	17	T1	0.0380708
2	12	0.0712761	T1					4	18	T1	0.0383118
2	13	0.0581272	T1					5	1	T1	0.0534882
2	14	0.110007	T1					5	2	T1	0.0982154
2	15	0.0896734	T1					5	3	T1	0.0870228
2	16	0.139487	T1					5	4	T1	0.074889
2	17	0.105448	T1					5	5	T1	0.0793549
2	18	0.0807754	T1					5	6	T1	0.0792941
2	19	0.133874	T1					5	7	T1	0.0807086
2	20	0.182916	T1					5	8	T1	0.0575857
2	21	0.0820778	T1					5	9	T1	0.0871836
2	22	0.0652827	T1					5	10	T1	0.0609889
2	23	0.0746356	T1					5	11	T1	0.0597998
2	24	0.120703	T1					5	12	T1	0.0507388
2	25	0.100035	T1					5	13	T1	0.0769202
2	26	0.104016	T1					5	14	T1	0.0241947
2	27	0.318561	T1					5	15	T1	0.0719129
2	28	0.0761365	T1					5	16	T1	0.0566389
2	29	0.0702598	T1					6	1	T1	0.0697153
2	30	0.110985	T1					6	2	T1	0.0596644
2	31	0.193371	T1					6	3	T1	0.069766
2	32	0.191105	T1					6	4	T1	0.0475498
2	33	0.0748652	T1					6	5	T1	0.0686705
2	34	0.139486	T1					6	6	T1	0.0596151
2	35	0.25983	T1					6	7	T1	0.0419
2	36	0.133326	T1					6	8	T1	0.0694749
2	37	0.0597857	T1					6	9	T1	0.070289
2	38	0.0603749	T1					6	10	T1	0.0247672
2	39	0.0759169	T1					6	11	T1	0.0848903
2	40	0.0471479	T1					6	12	T1	0.072202
2	41	0.0819223	T1					7	1	T1	0.0511674
2	42	0.27416	T1					7	2	T1	0.11437
2	43	0.182294	T1					7	3	T1	0.0563163
2	44	0.0572449	T1					7	4	T1	0.0379701
2	45	0.0810255	T1					7	5	T1	0.0749738
2	46	0.0538345	T1					7	6	T1	0.080861
2	47	0.0608288	T1					7	7	T1	0.07071
2	48	0.133747	T1					7	8	T1	0.0539237
2	49	0.0879138	T1					7	9	T1	0.0693115
2	50	0.0795776	T1					7	10	T1	0.0685858
2	51	0.120408	T1					7	11	T1	0.0631346
2	52	0.0716506	T1					7	12	T1	0.0605225
2	53	0.223282	T1					7	13	T1	0.0677833
2	54	0.0663491	T1					7	14	T1	0.0660516
2	55	0.0620523	T1					7	15	T1	0.0477019
2	56	0.116778	T1					7	16	T1	0.0683319
2	57	0.226168	T1					7	17	T1	0.0238548
2	58	0.0763613	T1					7	18	T1	0.0193121
2	59	0.0690553	T1					7	19	T1	0.064989
2	60	0.0724004	T1					7	20	T1	0.0484768
2	61	0.0983317	T1					7	21	T1	0.0604325
2	62	0.111695	T1					7	22	T1	0.0452966
2	63	0.08786	T1					7	23	T1	0.0648327
2	64	0.103101	T1					7	24	T1	0.0453605
2	65	0.105502	T1					7	25	T1	0.0440053
2	66	0.065319	T1					7	26	T1	0.0540468
2	67	0.19887	T1					7	27	T1	0.0596759
2	68	0.106716	T1					7	28	T1	0.0210961
2	69	0.140503	T1					7	29	T1	0.0588333
2	70	0.109277	T1					7	30	T1	0.0914647
2	71	0.190369	T1					7	31	T1	0.0580845
2	72	0.0801812	T1					7	32	T1	0.0247143
2	73	0.0773534	T1					7	33	T1	0.0651462
2	74	0.0912646	T1					8	1	T1	0.0549022
2	75	0.0905768	T1					8	2	T1	0.0647896
2	76	0.0710598	T1					8	3	T1	0.0566262
2	77	0.0960427	T1					8	4	T1	0.0605285
2	78	0.102765	T1					8	5	T1	0.071954
2	79	0.175895	T1					8	6	T1	0.0146896
2	80	0.09934	T1					8	7	T1	0.0625717
2	81	0.129864	T1					8	8	T1	0.0742088
2	82	0.0877912	T1					8	9	T1	0.0680032
2	83	0.157595	T1					8	10	T1	0.0702355
2	84	0.171918	T1					8	11	T1	0.0672336
2	85	0.127784	T1					8	12	T1	0.0907715
2	86	0.122309	T1					8	13	T1	0.0851222
2	87	0.150359	T1					8	14	T1	0.0678066
2	88	0.1031	T1					8	15	T1	0.0772028
2	89	0.169586	T1					8	16	T1	0.0482507
2	90	0.154847	T1					8	17	T1	0.089929
2	91	0.128296	T1					8	18	T1	0.0812495
2	92	0.219063	T1					8	19	T1	0.0788185
2	93	0.132196	T1					8	20	T1	0.060021
2	94	0.190242	T1					8	21	T1	0.0902961
2	95	0.184519	T1					8	22	T1	0.0803769
2	96	0.151348	T1					8	23	T1	0.0477995
2	97	0.221095	T1					8	24	T1	0.0580588
2	98	0.123406	T1					9	1	T2	0.118717
3	1	0.106493	T1					9	2	T2	0.128999
3	2	0.104092	T1					9	3	T2	0.0781941
3	3	0.139436	T1					9	4	T2	0.0999097
3	4	0.0965831	T1					9	5	T2	0.118876
3	5	0.122906	T1					9	6	T2	0.112916
3	6	0.11908	T1					9	7	T2	0.126363
3	7	0.25345	T1					9	8	T2	0.136788
3	8	0.119275	T1					9	9	T2	0.098404
3	9	0.0640677	T1					9	10	T2	0.0884919
3	10	0.115034	T1					9	11	T2	0.134874
3	11	0.20597	T1					9	12	T2	0.0752607
3	12	0.112822	T1					9	13	T2	0.0938245
3	13	0.16097	T1					9	14	T2	0.128684
3	14	0.104469	T1					9	15	T2	0.120982
3	15	0.0982125	T1					9	16	T2	0.0815848
3	16	0.214866	T1					9	17	T2	0.0849379
3	17	0.132227	T1					9	18	T2	0.0899016
3	18	0.0698307	T1					9	19	T2	0.123753
3	19	0.112224	T1					9	20	T2	0.0875157
3	20	0.0771831	T1					9	21	T2	0.137384
3	21	0.126161	T1					9	22	T2	0.0559092
3	22	0.137747	T1					9	23	T2	0.172211
3	23	0.108909	T1					9	24	T2	0.0939645
3	24	0.134976	T1					9	25	T2	0.0964398
3	25	0.097642	T1					9	26	T2	0.102753
3	26	0.186884	T1					9	27	T2	0.143135
3	27	0.0962061	T1					9	28	T2	0.106149
3	28	0.0693121	T1					9	29	T2	0.120228
3	29	0.169053	T1					9	30	T2	0.147236
3	30	0.216946	T1					9	31	T2	0.103151
3	31	0.0791671	T1					9	32	T2	0.137092
3	32	0.093551	T1					9	33	T2	0.115846
3	33	0.103891	T1					9	34	T2	0.148607
3	34	0.10946	T1					9	35	T2	0.130428
3	35	0.137601	T1					9	36	T2	0.0965628
3	36	0.105942	T1					9	37	T2	0.0838959
3	37	0.070133	T1					9	38	T2	0.106074
3	38	0.171696	T1					9	39	T2	0.121765
3	39	0.199963	T1					9	40	T2	0.0646934
3	40	0.0850213	T1					9	41	T2	0.140352
3	41	0.12025	T1					9	42	T2	0.0508692
3	42	0.051884	T1					10	1	T2	0.128785
3	43	0.0749236	T1					10	2	T2	0.137742
3	44	0.101242	T1					10	3	T2	0.11341
3	45	0.0635486	T1					10	4	T2	0.12377
3	46	0.0828606	T1					10	5	T2	0.140009
3	47	0.0853839	T1					10	6	T2	0.145491
3	48	0.104463	T1					10	7	T2	0.0986926
3	49	0.0772296	T1					10	8	T2	0.076068
3	50	0.206048	T1					10	9	T2	0.11433
3	51	0.0818505	T1					10	10	T2	0.135492
3	52	0.132857	T1					10	11	T2	0.106338
3	53	0.093233	T1					10	12	T2	0.107058
3	54	0.0957819	T1					10	13	T2	0.0740973
3	55	0.179441	T1					10	14	T2	0.0724789
3	56	0.101307	T1					10	15	T2	0.136063
3	57	0.0924271	T1					10	16	T2	0.110049
3	58	0.0944008	T1					10	17	T2	0.159012
3	59	0.112623	T1					10	18	T2	0.126188
3	60	0.0958065	T1					10	19	T2	0.133096
3	61	0.114268	T1					10	20	T2	0.0952867
3	62	0.125746	T1					10	21	T2	0.12679
3	63	0.0934772	T1					10	22	T2	0.153865
3	64	0.123348	T1					10	23	T2	0.0743004
3	65	0.107577	T1					10	24	T2	0.154576
3	66	0.109476	T1					10	25	T2	0.140726
3	67	0.147545	T1					10	26	T2	0.116059
3	68	0.109847	T1					10	27	T2	0.126624
3	69	0.0890987	T1					10	28	T2	0.117018
3	70	0.139772	T1					10	29	T2	0.129034
3	71	0.106507	T1					10	30	T2	0.123412
3	72	0.0924926	T1					10	31	T2	0.0646785
3	73	0.10669	T1					10	32	T2	0.108836
3	74	0.123104	T1					10	33	T2	0.0801819
3	75	0.0895673	T1					10	34	T2	0.0483377
3	76	0.0891408	T1					10	35	T2	0.083877
3	77	0.092891	T1					10	36	T2	0.0683628
3	78	0.0973206	T1					10	37	T2	0.105044
3	79	0.125368	T1					10	38	T2	0.109834
3	80	0.105095	T1					10	39	T2	0.206548
3	81	0.115969	T1					10	40	T2	0.0719854
3	82	0.150808	T1					10	41	T2	0.0792248
3	83	0.0700795	T1					10	42	T2	0.0941686
3	84	0.0568876	T1					10	43	T2	0.0870389
3	85	0.130374	T1					10	44	T2	0.074981
3	86	0.0559048	T1					10	45	T2	0.0527027
3	87	0.0708477	T1					10	46	T2	0.0841224
3	88	0.123803	T1					10	47	T2	0.129766
3	89	0.116147	T1					10	48	T2	0.111333
3	90	0.121032	T1					10	49	T2	0.127442
3	91	0.052155	T1					10	50	T2	0.124024
3	92	0.0452472	T1					10	51	T2	0.122949
3	93	0.0419418	T1					10	52	T2	0.10062
3	94	0.123297	T1					10	53	T2	0.0904422
3	95	0.113871	T1					10	54	T2	0.101986
3	96	0.0744455	T1					10	55	T2	0.127103
3	97	0.0419489	T1					11	1	T2	0.10223
3	98	0.244802	T1					11	2	T2	0.0824939
3	99	0.033774	T1					11	3	T2	0.118494
3	100	0.0504941	T1					11	4	T2	0.131234
3	101	0.136532	T1					11	5	T2	0.117251
3	102	0.0862239	T1					11	6	T2	0.0689063
3	103	0.0926141	T1					11	7	T2	0.0997484
3	104	0.138769	T1					11	8	T2	0.0885928
3	105	0.101148	T1					11	9	T2	0.136048
3	106	0.121367	T1					11	10	T2	0.0655313
3	107	0.0342758	T1					11	11	T2	0.111392
3	108	0.161615	T1					11	12	T2	0.135427
3	109	0.0636475	T1					11	13	T2	0.112477
3	110	0.0494181	T1					11	14	T2	0.0708776
4	1	0.16961	T1					11	15	T2	0.140044
4	2	0.185942	T1					11	16	T2	0.0569572
4	3	0.26101	T1					11	17	T2	0.0698581
4	4	0.134047	T1					11	18	T2	0.0760148
4	5	0.108233	T1					11	19	T2	0.126018
4	6	0.0987879	T1					11	20	T2	0.167493
4	7	0.0873729	T1					11	21	T2	0.125705
4	8	0.0646179	T1					11	22	T2	0.122942
4	9	0.131907	T1					11	23	T2	0.10459
4	10	0.160385	T1					11	24	T2	0.130178
4	11	0.149787	T1					11	25	T2	0.129918
4	12	0.0590246	T1					11	26	T2	0.124334
4	13	0.145847	T1					11	27	T2	0.132196
4	14	0.075445	T1					11	28	T2	0.126721
4	15	0.0912199	T1					13	1	T2	0.102801
4	16	0.167243	T1					13	2	T2	0.123347
4	17	0.103984	T1					13	3	T2	0.109171
4	18	0.0794012	T1					13	4	T2	0.125999
4	19	0.0966619	T1					13	5	T2	0.119523
4	20	0.11229	T1					13	6	T2	0.120517
4	21	0.0710244	T1					13	7	T2	0.0823295
4	22	0.143949	T1					13	8	T2	0.112459
4	23	0.0208143	T1					13	9	T2	0.0932304
4	24	0.111657	T1					13	10	T2	0.086086
4	25	0.0630496	T1					13	11	T2	0.141446
4	26	0.0652896	T1					13	12	T2	0.143448
4	27	0.107819	T1					13	13	T2	0.086655
4	28	0.114963	T1					13	14	T2	0.13483
4	29	0.126576	T1					13	15	T2	0.0728228
4	30	0.0627784	T1					13	16	T2	0.112863
4	31	0.0963123	T1					13	17	T2	0.139908
4	32	0.114055	T1					13	18	T2	0.0387937
4	33	0.121135	T1					13	19	T2	0.130318
4	34	0.0715512	T1					13	20	T2	0.115345
4	35	0.0697745	T1					13	21	T2	0.0865787
4	36	0.144005	T1					13	22	T2	0.0978801
4	37	0.131362	T1					13	23	T2	0.109217
4	38	0.0665372	T1					13	24	T2	0.143068
4	39	0.0673208	T1					13	25	T2	0.0683199
4	40	0.0825301	T1					13	26	T2	0.10844
4	41	0.0456968	T1					13	27	T2	0.130575
4	42	0.100545	T1					13	28	T2	0.158585
4	43	0.138846	T1					13	29	T2	0.111947
4	44	0.0774964	T1					13	30	T2	0.141585
4	45	0.148097	T1					13	31	T2	0.118438
4	46	0.0905802	T1					13	32	T2	0.0803673
4	47	0.0955469	T1					13	33	T2	0.0760141
4	48	0.0986049	T1					13	34	T2	0.129762
4	49	0.0691158	T1					13	35	T2	0.120329
4	50	0.0775666	T1					13	36	T2	0.181889
4	51	0.113322	T1					13	37	T2	0.115072
4	52	0.0942608	T1					13	38	T2	0.120155
4	53	0.052406	T1					13	39	T2	0.13839
4	54	0.104349	T1					13	40	T2	0.0996173
4	55	0.0831138	T1					13	41	T2	0.0939092
4	56	0.116619	T1					13	42	T2	0.115531
4	57	0.0719054	T1					13	43	T2	0.120704
4	58	0.108665	T1					13	44	T2	0.111888
4	59	0.113902	T1					13	45	T2	0.118169
4	60	0.0899394	T1					13	46	T2	0.103974
4	61	0.0770496	T1					13	47	T2	0.109152
4	62	0.103657	T1					13	48	T2	0.0792244
4	63	0.0814704	T1					13	49	T2	0.0940311
4	64	0.0849229	T1					13	50	T2	0.0680268
4	65	0.0846041	T1					13	51	T2	0.0874354
4	66	0.104845	T1					13	52	T2	0.117473
4	67	0.0742536	T1					13	53	T2	0.0923886
4	68	0.0884252	T1					13	54	T2	0.0876915
4	69	0.0768806	T1					13	55	T2	0.116255
4	70	0.0809609	T1					13	56	T2	0.0418187
4	71	0.0663547	T1					13	57	T2	0.0601462
4	72	0.0818177	T1					13	58	T2	0.0784002
4	73	0.0774801	T1					13	59	T2	0.0902965
4	74	0.084841	T1					13	60	T2	0.102991
4	75	0.0724835	T1					13	61	T2	0.0820742
4	76	0.0682038	T1					13	62	T2	0.0596191
4	77	0.058464	T1					13	63	T2	0.0692353
4	78	0.0911886	T1					13	64	T2	0.0605914
4	79	0.0338003	T1					13	65	T2	0.0845107
4	80	0.0718857	T1					14	1	T2	0.115928
4	81	0.042227	T1					14	2	T2	0.135392
4	82	0.074941	T1					14	3	T2	0.148352
4	83	0.0290633	T1					14	4	T2	0.12209
4	84	0.0601084	T1					14	5	T2	0.150352
4	85	0.0689478	T1					14	6	T2	0.129904
4	86	0.0717522	T1					14	7	T2	0.145795
4	87	0.0476796	T1					14	8	T2	0.0931973
4	88	0.0400055	T1					14	9	T2	0.0808582
4	89	0.0524628	T1					14	10	T2	0.158631
4	90	0.0333324	T1					14	11	T2	0.102436
4	91	0.0534368	T1					14	12	T2	0.120538
4	92	0.143403	T1					14	13	T2	0.105577
4	93	0.0417939	T1					14	14	T2	0.0764379
4	94	0.0361469	T1					14	15	T2	0.109674
5	1	0.218985	T1					14	16	T2	0.139673
5	2	0.0823279	T1					14	17	T2	0.16319
5	3	0.118135	T1					14	18	T2	0.105145
5	4	0.158277	T1					14	19	T2	0.0867208
5	5	0.156835	T1					14	20	T2	0.0724362
5	6	0.120446	T1					14	21	T2	0.105931
5	7	0.199564	T1					14	22	T2	0.119677
5	8	0.0893487	T1					14	23	T2	0.0617749
5	9	0.0882739	T1					14	24	T2	0.110695
5	10	0.13936	T1					16	1	T2	0.137732
5	11	0.12894	T1					16	2	T2	0.0793385
5	12	0.133609	T1					16	3	T2	0.104327
5	13	0.0968728	T1					16	4	T2	0.110973
5	14	0.0829283	T1					16	5	T2	0.154504
5	15	0.0963563	T1					16	6	T2	0.139178
5	16	0.203465	T1					16	7	T2	0.141238
5	17	0.0979535	T1					16	8	T2	0.116173
5	18	0.125142	T1					16	9	T2	0.144114
5	19	0.10701	T1					16	10	T2	0.158059
5	20	0.186667	T1					16	11	T2	0.084096
5	21	0.12613	T1					16	12	T2	0.208546
5	22	0.101558	T1					16	13	T2	0.112941
5	23	0.126316	T1					16	14	T2	0.0901677
5	24	0.164378	T1					16	15	T2	0.140096
5	25	0.0603303	T1					16	16	T2	0.126474
5	26	0.0694571	T1					16	17	T2	0.0793961
5	27	0.167112	T1					16	18	T2	0.102319
5	28	0.0884247	T1					16	19	T2	0.0782731
5	29	0.132953	T1					16	20	T2	0.116759
5	30	0.0826277	T1					16	21	T2	0.0906915
5	31	0.094289	T1					16	22	T2	0.0523142
5	32	0.113099	T1					16	23	T2	0.125695
5	33	0.0606177	T1					16	24	T2	0.0783519
5	34	0.158673	T1					16	25	T2	0.111042
5	35	0.0777585	T1					16	26	T2	0.129277
5	36	0.0951063	T1					16	27	T2	0.166024
5	37	0.115885	T1					16	28	T2	0.0692417
5	38	0.0895898	T1					16	29	T2	0.0697583
5	39	0.0913638	T1					16	30	T2	0.0891714
5	40	0.139962	T1					16	31	T2	0.0893501
5	41	0.0832242	T1					16	32	T2	0.162284
5	42	0.148087	T1					16	33	T2	0.250573
5	43	0.10889	T1					16	34	T2	0.0803411
5	44	0.118164	T1					16	35	T2	0.101874
5	45	0.116225	T1					16	36	T2	0.100714
5	46	0.132521	T1					16	37	T2	0.165786
5	47	0.125722	T1					16	38	T2	0.156765
5	48	0.0754915	T1					16	39	T2	0.134568
5	49	0.0755699	T1					16	40	T2	0.165079
5	50	0.103699	T1					16	41	T2	0.113789
5	51	0.0956033	T1					16	42	T2	0.118925
5	52	0.104625	T1					16	43	T2	0.106198
5	53	0.0966025	T1					16	44	T2	0.0826033
5	54	0.133001	T1					16	45	T2	0.0890143
5	55	0.111809	T1					16	46	T2	0.105693
5	56	0.148044	T1					16	47	T2	0.0929811
5	57	0.0844393	T1					16	48	T2	0.06474
5	58	0.0987164	T1					16	49	T2	0.0944376
5	59	0.12266	T1					19	1	WT	0.0424285
5	60	0.114064	T1					19	2	WT	0.073477
5	61	0.126478	T1					19	3	WT	0.0741983
5	62	0.0512793	T1					19	4	WT	0.0837756
5	63	0.0728379	T1					19	5	WT	0.0774268
5	64	0.116139	T1					19	6	WT	0.109344
5	65	0.0720244	T1					19	7	WT	0.0440781
5	66	0.144515	T1					19	8	WT	0.0689032
5	67	0.164451	T1					19	9	WT	0.0870417
5	68	0.135203	T1					19	10	WT	0.0419426
5	69	0.114492	T1					19	11	WT	0.114462
5	70	0.0497694	T1					19	12	WT	0.100439
5	71	0.102368	T1					19	13	WT	0.0744718
5	72	0.111996	T1					19	14	WT	0.0859307
5	73	0.0477359	T1					19	15	WT	0.0789469
5	74	0.0436321	T1					19	16	WT	0.0517686
5	75	0.0803355	T1					19	17	WT	0.0943274
5	76	0.115829	T1					19	18	WT	0.0481836
5	77	0.0465722	T1					19	19	WT	0.044698
5	78	0.0961745	T1					19	20	WT	0.0537341
5	79	0.0706834	T1					19	21	WT	0.0465775
5	80	0.141023	T1					19	22	WT	0.032544
5	81	0.150983	T1					19	23	WT	0.108319
5	82	0.108212	T1					19	24	WT	0.0979745
5	83	0.112572	T1					19	25	WT	0.100194
5	84	0.0454297	T1					19	26	WT	0.0605071
5	85	0.0411256	T1					19	27	WT	0.0803242
5	86	0.0933641	T1					19	28	WT	0.0527316
5	87	0.0520237	T1					19	29	WT	0.0931243
5	88	0.121084	T1					19	30	WT	0.075237
5	89	0.105418	T1					19	31	WT	0.103224
5	90	0.149395	T1					19	32	WT	0.0534702
5	91	0.0447569	T1					19	33	WT	0.0333416
5	92	0.0370337	T1					19	34	WT	0.0459361
5	93	0.0727378	T1					19	35	WT	0.04828
5	94	0.0711817	T1					19	36	WT	0.0451414
5	95	0.0867083	T1					19	37	WT	0.0829863
5	96	0.049414	T1					21	1	WT	0.068238
5	97	0.194782	T1					21	2	WT	0.0965552
5	98	0.143845	T1					21	3	WT	0.0521374
5	99	0.0406044	T1					21	4	WT	0.036883
5	100	0.0432846	T1					21	5	WT	0.101771
5	101	0.0369775	T1					21	6	WT	0.0642948
5	102	0.0529379	T1					21	7	WT	0.149315
5	103	0.113801	T1					21	8	WT	0.111164
6	1	0.129853	T1					21	9	WT	0.0694298
6	2	0.0598893	T1					21	10	WT	0.0703253
6	3	0.138279	T1					21	11	WT	0.0827518
6	4	0.0593419	T1					21	12	WT	0.0799773
6	5	0.107881	T1					21	13	WT	0.0511663
6	6	0.0641275	T1					21	14	WT	0.102728
6	7	0.130312	T1					21	15	WT	0.116473
6	8	0.118939	T1					21	16	WT	0.0843139
6	9	0.0734636	T1					21	17	WT	0.0837369
6	10	0.0606119	T1					21	18	WT	0.0754774
6	11	0.0546376	T1					21	19	WT	0.120786
6	12	0.0839676	T1					21	20	WT	0.136033
6	13	0.0663465	T1					21	21	WT	0.131916
6	14	0.125345	T1					21	22	WT	0.102571
6	15	0.0953234	T1					21	23	WT	0.102546
6	16	0.0766533	T1					21	24	WT	0.0996162
6	17	0.136854	T1					21	25	WT	0.0849831
6	18	0.0857282	T1					21	26	WT	0.0982183
6	19	0.146999	T1					21	27	WT	0.0571753
6	20	0.108892	T1					21	28	WT	0.0738881
6	21	0.0632176	T1					21	29	WT	0.0624923
6	22	0.0672671	T1					23	1	WT	0.0565526
6	23	0.0766786	T1					23	2	WT	0.110109
6	24	0.0785846	T1					23	3	WT	0.0990126
6	25	0.187162	T1					23	4	WT	0.0946577
6	26	0.119672	T1					23	5	WT	0.125866
6	27	0.0492836	T1					23	6	WT	0.0712833
6	28	0.0819376	T1					23	7	WT	0.113861
6	29	0.100678	T1					23	8	WT	0.0994241
6	30	0.0571552	T1					23	9	WT	0.127867
6	31	0.128617	T1					23	10	WT	0.107543
6	32	0.0744436	T1					23	11	WT	0.0657649
6	33	0.0774366	T1					23	12	WT	0.120495
6	34	0.0987043	T1					23	13	WT	0.0883135
6	35	0.0619596	T1					23	14	WT	0.0835443
6	36	0.137347	T1					23	15	WT	0.0960229
6	37	0.0334108	T1					23	16	WT	0.117808
6	38	0.175346	T1					23	17	WT	0.0745156
6	39	0.0751769	T1					23	18	WT	0.106781
6	40	0.0773041	T1					23	19	WT	0.0905492
6	41	0.126609	T1					23	20	WT	0.0702545
6	42	0.106345	T1					23	21	WT	0.0428984
6	43	0.0354704	T1					23	22	WT	0.0872178
6	44	0.0917062	T1					23	23	WT	0.0812767
6	45	0.112876	T1					23	24	WT	0.0510427
6	46	0.120843	T1					23	25	WT	0.26685
6	47	0.162898	T1					23	26	WT	0.177248
6	48	0.133076	T1					24	1	WT	0.112964
6	49	0.114485	T1					24	2	WT	0.104953
6	50	0.083116	T1					24	3	WT	0.108363
6	51	0.112054	T1					24	4	WT	0.117565
6	52	0.0829347	T1					24	5	WT	0.107441
6	53	0.122453	T1					24	6	WT	0.108012
6	54	0.101973	T1					24	7	WT	0.113683
6	55	0.177695	T1					24	8	WT	0.121997
6	56	0.0828876	T1					24	9	WT	0.148054
6	57	0.152989	T1					24	10	WT	0.138514
6	58	0.109374	T1					24	11	WT	0.137798
6	59	0.0637182	T1					24	12	WT	0.119066
6	60	0.0821399	T1					24	13	WT	0.0916916
6	61	0.102979	T1					24	14	WT	0.0572407
6	62	0.0917653	T1					24	15	WT	0.0999307
6	63	0.0736201	T1					24	16	WT	0.0799281
6	64	0.132583	T1					24	17	WT	0.0527352
6	65	0.0810347	T1					24	18	WT	0.124818
6	66	0.0578592	T1					24	19	WT	0.109086
6	67	0.0466158	T1					24	20	WT	0.103513
6	68	0.120853	T1					24	21	WT	0.0820889
6	69	0.180238	T1					24	22	WT	0.0834815
6	70	0.0663531	T1					24	23	WT	0.0839169
6	71	0.073326	T1					24	24	WT	0.0493413
6	72	0.0464185	T1					24	25	WT	0.118989
6	73	0.0668121	T1					24	26	WT	0.0594263
6	74	0.0744647	T1					24	27	WT	0.0462376
6	75	0.105871	T1					24	28	WT	0.0875175
6	76	0.0669087	T1					24	29	WT	0.103993
6	77	0.0549277	T1					24	30	WT	0.11069
6	78	0.0478678	T1					24	31	WT	0.0946449
6	79	0.147897	T1					24	32	WT	0.120648
6	80	0.0717672	T1					24	33	WT	0.0657164
6	81	0.0493845	T1					24	34	WT	0.0839732
6	82	0.0483834	T1					24	35	WT	0.100074
6	83	0.0743606	T1					24	36	WT	0.0823696
6	84	0.0451457	T1					24	37	WT	0.112682
6	85	0.106286	T1					26	1	WT	0.0700981
6	86	0.047048	T1					26	2	WT	0.0914373
6	87	0.0291209	T1					26	3	WT	0.113238
6	88	0.0792299	T1					26	4	WT	0.0915998
6	89	0.0482822	T1					26	5	WT	0.11019
6	90	0.0400286	T1					26	6	WT	0.128085
6	91	0.0343976	T1					26	7	WT	0.0824205
6	92	0.0372628	T1					26	8	WT	0.114999
6	93	0.0382539	T1					26	9	WT	0.115437
6	94	0.0386604	T1					26	10	WT	0.0855736
7	1	0.0277865	T1					26	11	WT	0.0792897
7	2	0.0751584	T1					26	12	WT	0.0885163
7	3	0.0304028	T1					26	13	WT	0.0551821
7	4	0.0234673	T1					26	14	WT	0.0222965
7	5	0.0408781	T1					26	15	WT	0.129472
7	6	0.0277724	T1					26	16	WT	0.173131
7	7	0.115919	T1					26	17	WT	0.118745
7	8	0.107805	T1					26	18	WT	0.0986321
7	9	0.0867109	T1					26	19	WT	0.119197
7	10	0.179337	T1					26	20	WT	0.16066
7	11	0.251465	T1					26	21	WT	0.0940496
7	12	0.214696	T1					26	22	WT	0.0810108
7	13	0.178993	T1					26	23	WT	0.0638796
7	14	0.199438	T1					26	24	WT	0.0967264
7	15	0.174106	T1					26	25	WT	0.159633
7	16	0.206039	T1					26	26	WT	0.0710426
7	17	0.103744	T1					26	27	WT	0.0809959
7	18	0.140737	T1					26	28	WT	0.0771893
7	19	0.101914	T1					26	29	WT	0.053658
7	20	0.142316	T1					26	30	WT	0.137408
7	21	0.143214	T1					26	31	WT	0.0560158
7	22	0.130357	T1					26	32	WT	0.0770213
7	23	0.119602	T1					26	33	WT	0.11217
7	24	0.109289	T1					26	34	WT	0.149004
7	25	0.14628	T1					26	35	WT	0.0784932
7	26	0.137711	T1					26	36	WT	0.0792541
7	27	0.0985339	T1					26	37	WT	0.0965745
7	28	0.153319	T1					26	38	WT	0.0851381
7	29	0.104407	T1					26	39	WT	0.0449751
7	30	0.112192	T1					26	40	WT	0.0864004
7	31	0.115109	T1					26	41	WT	0.122308
7	32	0.0996362	T1					26	42	WT	0.109812
7	33	0.122573	T1					26	43	WT	0.13894
7	34	0.094719	T1					26	44	WT	0.0934497
7	35	0.0914247	T1					26	45	WT	0.157621
7	36	0.12864	T1					26	46	WT	0.0981217
7	37	0.0404764	T1					26	47	WT	0.0526331
7	38	0.119946	T1					26	48	WT	0.104255
7	39	0.075495	T1					26	49	WT	0.0542008
7	40	0.0951204	T1					26	50	WT	0.0971998
7	41	0.126058	T1					26	51	WT	0.072375
7	42	0.0943705	T1					26	52	WT	0.07079
7	43	0.142641	T1					26	53	WT	0.127265
7	44	0.0813742	T1					26	54	WT	0.0755411
7	45	0.0634483	T1					26	55	WT	0.0564626
7	46	0.0916126	T1					26	56	WT	0.160089
7	47	0.0589594	T1					26	57	WT	0.091395
7	48	0.078455	T1					26	58	WT	0.103705
7	49	0.151741	T1					26	59	WT	0.104254
7	50	0.100923	T1					26	60	WT	0.147105
7	51	0.0737505	T1					26	61	WT	0.0873321
7	52	0.0697269	T1					26	62	WT	0.08535
7	53	0.0764681	T1					26	63	WT	0.0808761
7	54	0.0552786	T1
7	55	0.100474	T1
7	56	0.0557889	T1
7	57	0.0570149	T1
7	58	0.0564013	T1
7	59	0.114543	T1
7	60	0.0510094	T1
7	61	0.0976451	T1
7	62	0.0847508	T1
7	63	0.0528071	T1
7	64	0.0538324	T1
7	65	0.101726	T1
7	66	0.0460242	T1
7	67	0.167292	T1
7	68	0.0579906	T1
7	69	0.0593437	T1
7	70	0.066617	T1
7	71	0.0726709	T1
7	72	0.136328	T1
7	73	0.123802	T1
7	74	0.104931	T1
7	75	0.058373	T1
7	76	0.0870659	T1
7	77	0.137738	T1
7	78	0.0654245	T1
7	79	0.0580807	T1
7	80	0.0640065	T1
7	81	0.103694	T1
8	1	0.212642	T1
8	2	0.0641861	T1
8	3	0.0610097	T1
8	4	0.0722346	T1
8	5	0.145853	T1
8	6	0.0473419	T1
8	7	0.125267	T1
8	8	0.0560294	T1
8	9	0.0980746	T1
8	10	0.075912	T1
8	11	0.0573557	T1
8	12	0.136734	T1
8	13	0.0862985	T1
8	14	0.0526776	T1
8	15	0.103965	T1
8	16	0.16308	T1
8	17	0.0920865	T1
8	18	0.0992435	T1
8	19	0.194894	T1
8	20	0.0731246	T1
8	21	0.078277	T1
8	22	0.0767572	T1
8	23	0.0435408	T1
8	24	0.128466	T1
8	25	0.123811	T1
8	26	0.0804038	T1
8	27	0.145891	T1
8	28	0.0886583	T1
8	29	0.0849077	T1
8	30	0.0764795	T1
8	31	0.0915372	T1
8	32	0.0717285	T1
8	33	0.131908	T1
8	34	0.117582	T1
8	35	0.0941228	T1
8	36	0.0745753	T1
8	37	0.0753588	T1
8	38	0.0981425	T1
8	39	0.0804218	T1
8	40	0.0884179	T1
8	41	0.0297991	T1
8	42	0.0715201	T1
8	43	0.0969566	T1
8	44	0.0642763	T1
8	45	0.0792901	T1
8	46	0.0939855	T1
8	47	0.120566	T1
8	48	0.0722292	T1
8	49	0.0725048	T1
8	50	0.0752253	T1
8	51	0.0958128	T1
8	52	0.0825616	T1
8	53	0.0957201	T1
8	54	0.0634469	T1
8	55	0.0658665	T1
8	56	0.15684	T1
8	57	0.0714551	T1
8	58	0.0592869	T1
8	59	0.140683	T1
8	60	0.113103	T1
8	61	0.0804094	T1
8	62	0.074893	T1
8	63	0.0576504	T1
8	64	0.0589337	T1
8	65	0.0640798	T1
8	66	0.0894946	T1
8	67	0.139006	T1
8	68	0.0856974	T1
8	69	0.0455845	T1
8	70	0.0545587	T1
8	71	0.0615022	T1
8	72	0.0516308	T1
8	73	0.0460592	T1
8	74	0.0581736	T1
8	75	0.121736	T1
8	76	0.101812	T1
8	77	0.0407696	T1
8	78	0.0637197	T1
33	1	0.147752	T2
33	2	0.182214	T2
33	3	0.164228	T2
33	4	0.150807	T2
33	5	0.146653	T2
33	6	0.189192	T2
33	7	0.2016	T2
33	8	0.155997	T2
33	9	0.146586	T2
33	10	0.183501	T2
33	11	0.154241	T2
33	12	0.128884	T2
33	13	0.134401	T2
33	14	0.101123	T2
33	15	0.111292	T2
33	16	0.13698	T2
33	17	0.082281	T2
33	18	0.151722	T2
33	19	0.102682	T2
33	20	0.0908367	T2
33	21	0.105519	T2
33	22	0.0993514	T2
33	23	0.0847727	T2
33	24	0.0503293	T2
33	25	0.134298	T2
33	26	0.115319	T2
33	27	0.0570571	T2
33	28	0.0692468	T2
33	29	0.131772	T2
33	30	0.104653	T2
33	31	0.0890996	T2
33	32	0.068544	T2
33	33	0.0554509	T2
33	34	0.105458	T2
33	35	0.122494	T2
33	36	0.0878319	T2
33	37	0.110727	T2
33	38	0.0747285	T2
33	39	0.101695	T2
33	40	0.135384	T2
33	41	0.11344	T2
33	42	0.0739724	T2
33	43	0.088818	T2
33	44	0.0976364	T2
33	45	0.0845054	T2
33	46	0.100728	T2
33	47	0.0779398	T2
33	48	0.0978428	T2
33	49	0.0979974	T2
33	50	0.0927432	T2
33	51	0.11432	T2
33	52	0.0895522	T2
33	53	0.0758802	T2
33	54	0.0830812	T2
33	55	0.0916425	T2
33	56	0.09721	T2
33	57	0.0741537	T2
33	58	0.129694	T2
33	59	0.0835169	T2
33	60	0.0775847	T2
33	61	0.0691833	T2
33	62	0.0799602	T2
33	63	0.0811268	T2
33	64	0.0560958	T2
33	65	0.0544877	T2
33	66	0.0748688	T2
33	67	0.130714	T2
33	68	0.0847479	T2
33	69	0.0658767	T2
33	70	0.0523504	T2
33	71	0.0820565	T2
33	72	0.116469	T2
33	73	0.0480567	T2
33	74	0.073234	T2
33	75	0.0615722	T2
33	76	0.0695026	T2
33	77	0.0669667	T2
33	78	0.119137	T2
33	79	0.0781218	T2
33	80	0.0632834	T2
33	81	0.0501458	T2
33	82	0.282291	T2
33	83	0.0635688	T2
33	84	0.0838637	T2
33	85	0.0798561	T2
33	86	0.0977662	T2
33	87	0.0785274	T2
33	88	0.0809711	T2
33	89	0.0996265	T2
33	90	0.0757356	T2
33	91	0.0715075	T2
33	92	0.0728762	T2
33	93	0.0770803	T2
33	94	0.135174	T2
33	95	0.112766	T2
33	96	0.0751896	T2
33	97	0.093016	T2
33	98	0.0995817	T2
33	99	0.0752951	T2
33	100	0.121083	T2
33	101	0.0929365	T2
33	102	0.0714892	T2
33	103	0.0906588	T2
33	104	0.0844757	T2
33	105	0.0740538	T2
33	106	0.0759308	T2
33	107	0.069329	T2
33	108	0.0933809	T2
33	109	0.0774392	T2
33	110	0.0392158	T2
33	111	0.0736575	T2
34	1	0.142294	T2
34	2	0.267442	T2
34	3	0.230269	T2
34	4	0.263623	T2
34	5	0.0851695	T2
34	6	0.175101	T2
34	7	0.105696	T2
34	8	0.13205	T2
34	9	0.11874	T2
34	10	0.282001	T2
34	11	0.166235	T2
34	12	0.122886	T2
34	13	0.118534	T2
34	14	0.137796	T2
34	15	0.244324	T2
34	16	0.184536	T2
34	17	0.125379	T2
34	18	0.319518	T2
34	19	0.339631	T2
34	20	0.142732	T2
34	21	0.114974	T2
34	22	0.355321	T2
34	23	0.0608728	T2
34	24	0.148222	T2
34	25	0.155127	T2
34	26	0.140883	T2
34	27	0.123633	T2
34	28	0.143177	T2
34	29	0.310586	T2
34	30	0.182468	T2
34	31	0.140645	T2
34	32	0.123507	T2
34	33	0.169504	T2
34	34	0.105868	T2
34	35	0.403311	T2
34	36	0.207888	T2
34	37	0.225363	T2
34	38	0.11629	T2
34	39	0.279407	T2
34	40	0.18798	T2
34	41	0.107397	T2
34	42	0.201354	T2
34	43	0.252205	T2
34	44	0.154682	T2
34	45	0.437508	T2
34	46	0.0874143	T2
34	47	0.274043	T2
34	48	0.102124	T2
34	49	0.149052	T2
34	50	0.143642	T2
34	51	0.239851	T2
34	52	0.159765	T2
34	53	0.200592	T2
34	54	0.104346	T2
34	55	0.14408	T2
34	56	0.200625	T2
34	57	0.123297	T2
34	58	0.303494	T2
34	59	0.113906	T2
34	60	0.158676	T2
34	61	0.113022	T2
34	62	0.283268	T2
34	63	0.120072	T2
34	64	0.140406	T2
34	65	0.139391	T2
34	66	0.184977	T2
34	67	0.186631	T2
34	68	0.345215	T2
34	69	0.171417	T2
34	70	0.238297	T2
34	71	0.10936	T2
34	72	0.117394	T2
34	73	0.163502	T2
34	74	0.307131	T2
34	75	0.159708	T2
34	76	0.205191	T2
34	77	0.164226	T2
34	78	0.218557	T2
34	79	0.189063	T2
34	80	0.122881	T2
34	81	0.19148	T2
34	82	0.255493	T2
34	83	0.242801	T2
34	84	0.226267	T2
34	85	0.300176	T2
35	1	0.278587	T2
35	2	0.42697	T2
35	3	0.346679	T2
35	4	0.313522	T2
35	5	0.259284	T2
35	6	0.414399	T2
35	7	0.228211	T2
35	8	0.339838	T2
35	9	0.284487	T2
35	10	0.163215	T2
35	11	0.306527	T2
35	12	0.343453	T2
35	13	0.254221	T2
35	14	0.25291	T2
35	15	0.354851	T2
35	16	0.209856	T2
35	17	0.288488	T2
35	18	0.147478	T2
35	19	0.183174	T2
35	20	0.266842	T2
35	21	0.214776	T2
35	22	0.282496	T2
35	23	0.279306	T2
35	24	0.161654	T2
35	25	0.364646	T2
35	26	0.204522	T2
35	27	0.181523	T2
35	28	0.121847	T2
35	29	0.232495	T2
35	30	0.208097	T2
35	31	0.251894	T2
35	32	0.213161	T2
35	33	0.213768	T2
35	34	0.194417	T2
35	35	0.173836	T2
35	36	0.193113	T2
35	37	0.200582	T2
35	38	0.14596	T2
35	39	0.273282	T2
35	40	0.253508	T2
35	41	0.208101	T2
35	42	0.0999161	T2
35	43	0.191124	T2
35	44	0.185489	T2
35	45	0.166473	T2
35	46	0.252249	T2
35	47	0.31441	T2
35	48	0.243324	T2
35	49	0.163115	T2
35	50	0.136669	T2
35	51	0.173785	T2
35	52	0.122025	T2
35	53	0.142433	T2
35	54	0.110853	T2
35	55	0.165641	T2
35	56	0.326705	T2
35	57	0.162975	T2
35	58	0.172335	T2
35	59	0.203965	T2
35	60	0.158845	T2
35	61	0.270437	T2
35	62	0.218266	T2
35	63	0.128012	T2
35	64	0.160567	T2
35	65	0.193406	T2
35	66	0.218147	T2
35	67	0.241028	T2
35	68	0.210791	T2
35	69	0.251628	T2
35	70	0.207987	T2
35	71	0.251242	T2
36	1	0.408747	T2
36	2	0.408842	T2
36	3	0.451387	T2
36	4	0.268979	T2
36	5	0.510521	T2
36	6	0.265573	T2
36	7	0.284261	T2
36	8	0.181812	T2
36	9	0.384138	T2
36	10	0.254012	T2
36	11	0.395302	T2
36	12	0.19705	T2
36	13	0.210043	T2
36	14	0.256574	T2
36	15	0.166005	T2
36	16	0.149926	T2
36	17	0.243163	T2
36	18	0.0616185	T2
36	19	0.232015	T2
36	20	0.151698	T2
36	21	0.217047	T2
36	22	0.211326	T2
36	23	0.149565	T2
36	24	0.193549	T2
36	25	0.213389	T2
36	26	0.13638	T2
36	27	0.22536	T2
36	28	0.127918	T2
36	29	0.125154	T2
36	30	0.124522	T2
36	31	0.101491	T2
36	32	0.121363	T2
36	33	0.139928	T2
36	34	0.135238	T2
36	35	0.121396	T2
36	36	0.0862761	T2
36	37	0.126971	T2
36	38	0.174397	T2
36	39	0.109218	T2
36	40	0.10152	T2
36	41	0.0807852	T2
36	42	0.122804	T2
36	43	0.134704	T2
36	44	0.130088	T2
36	45	0.11819	T2
36	46	0.0786167	T2
36	47	0.0893166	T2
36	48	0.105617	T2
36	49	0.139875	T2
36	50	0.127425	T2
36	51	0.136977	T2
36	52	0.082559	T2
36	53	0.184874	T2
36	54	0.12907	T2
36	55	0.0928909	T2
36	56	0.135677	T2
36	57	0.107294	T2
36	58	0.157499	T2
36	59	0.0793405	T2
36	60	0.0870743	T2
36	61	0.12523	T2
36	62	0.0883162	T2
36	63	0.100572	T2
36	64	0.109479	T2
36	65	0.132682	T2
36	66	0.110018	T2
36	67	0.0809003	T2
36	68	0.0961715	T2
36	69	0.109223	T2
36	70	0.0879306	T2
36	71	0.0970154	T2
36	72	0.129012	T2
36	73	0.0789269	T2
36	74	0.0717198	T2
36	75	0.10998	T2
36	76	0.0773006	T2
36	77	0.144183	T2
36	78	0.0973714	T2
36	79	0.0860185	T2
37	1	0.149604	T2
37	2	0.225547	T2
37	3	0.195506	T2
37	4	0.217887	T2
37	5	0.0803944	T2
37	6	0.194046	T2
37	7	0.108329	T2
37	8	0.112573	T2
37	9	0.105357	T2
37	10	0.12763	T2
37	11	0.110325	T2
37	12	0.305165	T2
37	13	0.150476	T2
37	14	0.141396	T2
37	15	0.131363	T2
37	16	0.185924	T2
37	17	0.119636	T2
37	18	0.112019	T2
37	19	0.313426	T2
37	20	0.133404	T2
37	21	0.12061	T2
37	22	0.30928	T2
37	23	0.0796749	T2
37	24	0.139078	T2
37	25	0.130262	T2
37	26	0.141285	T2
37	27	0.125566	T2
37	28	0.115758	T2
37	29	0.102763	T2
37	30	0.304518	T2
37	31	0.155677	T2
37	32	0.195368	T2
37	33	0.11977	T2
37	34	0.404099	T2
37	35	0.202939	T2
37	36	0.108336	T2
37	37	0.112791	T2
37	38	0.267319	T2
37	39	0.11637	T2
37	40	0.160923	T2
37	41	0.0988836	T2
37	42	0.241733	T2
37	43	0.421816	T2
37	44	0.271313	T2
37	45	0.181689	T2
37	46	0.120846	T2
37	47	0.158862	T2
37	48	0.125115	T2
37	49	0.0861805	T2
37	50	0.103053	T2
37	51	0.24119	T2
37	52	0.165937	T2
37	53	0.133432	T2
37	54	0.159155	T2
37	55	0.186702	T2
37	56	0.137186	T2
37	57	0.121001	T2
37	58	0.115831	T2
37	59	0.110572	T2
37	60	0.306565	T2
37	61	0.0928791	T2
37	62	0.128126	T2
37	63	0.181961	T2
37	64	0.168716	T2
37	65	0.133396	T2
37	66	0.103878	T2
37	67	0.228933	T2
37	68	0.120907	T2
37	69	0.165332	T2
37	70	0.0943319	T2
37	71	0.313998	T2
37	72	0.137677	T2
37	73	0.230396	T2
37	74	0.188862	T2
37	75	0.200975	T2
37	76	0.159116	T2
37	77	0.148958	T2
37	78	0.251547	T2
37	79	0.223481	T2
38	1	0.335624	T2
38	2	0.279178	T2
38	3	0.26717	T2
38	4	0.189854	T2
38	5	0.2784	T2
38	6	0.196231	T2
38	7	0.245464	T2
38	8	0.323886	T2
38	9	0.254374	T2
38	10	0.19334	T2
38	11	0.246664	T2
38	12	0.196089	T2
38	13	0.175878	T2
38	14	0.267711	T2
38	15	0.195841	T2
38	16	0.111947	T2
38	17	0.211574	T2
38	18	0.16587	T2
38	19	0.137063	T2
38	20	0.185261	T2
38	21	0.297853	T2
38	22	0.114658	T2
38	23	0.174117	T2
38	24	0.267612	T2
38	25	0.139633	T2
38	26	0.242961	T2
38	27	0.130821	T2
38	28	0.20979	T2
38	29	0.123934	T2
38	30	0.163453	T2
38	31	0.103638	T2
38	32	0.165234	T2
38	33	0.226404	T2
38	34	0.139932	T2
38	35	0.13308	T2
38	36	0.219507	T2
38	37	0.224468	T2
38	38	0.313515	T2
38	39	0.146776	T2
38	40	0.159449	T2
38	41	0.122678	T2
38	42	0.191287	T2
38	43	0.141731	T2
38	44	0.0798528	T2
38	45	0.155175	T2
38	46	0.183753	T2
38	47	0.136676	T2
38	48	0.200467	T2
38	49	0.164286	T2
38	50	0.176272	T2
38	51	0.0799816	T2
38	52	0.148585	T2
38	53	0.160672	T2
38	54	0.114008	T2
38	55	0.217266	T2
38	56	0.134623	T2
38	57	0.176074	T2
38	58	0.162163	T2
38	59	0.127703	T2
38	60	0.169419	T2
38	61	0.155014	T2
38	62	0.0888515	T2
38	63	0.127173	T2
38	64	0.0916994	T2
38	65	0.167609	T2
38	66	0.120265	T2
38	67	0.11567	T2
38	68	0.165545	T2
38	69	0.119248	T2
38	70	0.172611	T2
38	71	0.116294	T2
38	72	0.161575	T2
38	73	0.133929	T2
38	74	0.105325	T2
38	75	0.099462	T2
38	76	0.165746	T2
38	77	0.0996304	T2
38	78	0.122424	T2
38	79	0.136439	T2
38	80	0.180839	T2
38	81	0.0936129	T2
38	82	0.106624	T2
38	83	0.152724	T2
38	84	0.146348	T2
38	85	0.156835	T2
38	86	0.111975	T2
38	87	0.108045	T2
38	88	0.0983705	T2
38	89	0.0820663	T2
38	90	0.0772523	T2
38	91	0.136581	T2
38	92	0.120323	T2
38	93	0.165689	T2
38	94	0.115498	T2
38	95	0.0608888	T2
38	96	0.0545346	T2
38	97	0.153508	T2
38	98	0.0746027	T2
38	99	0.176107	T2
38	100	0.0963007	T2
38	101	0.0671112	T2
38	102	0.131881	T2
38	103	0.149536	T2
38	104	0.0582463	T2
38	105	0.0703588	T2
38	106	0.178177	T2
38	107	0.0325526	T2
38	108	0.0663943	T2
38	109	0.122515	T2
38	110	0.0554938	T2
38	111	0.148266	T2
39	1	0.511132	T2
39	2	0.416161	T2
39	3	0.367596	T2
39	4	0.195251	T2
39	5	0.384913	T2
39	6	0.151992	T2
39	7	0.269571	T2
39	8	0.395356	T2
39	9	0.203163	T2
39	10	0.216981	T2
39	11	0.226872	T2
39	12	0.403545	T2
39	13	0.180086	T2
39	14	0.300208	T2
39	15	0.11436	T2
39	16	0.348806	T2
39	17	0.42249	T2
39	18	0.192291	T2
39	19	0.116531	T2
39	20	0.111242	T2
39	21	0.198719	T2
39	22	0.325815	T2
39	23	0.1921	T2
39	24	0.295492	T2
39	25	0.135071	T2
39	26	0.138139	T2
39	27	0.427016	T2
39	28	0.179718	T2
39	29	0.182641	T2
39	30	0.347684	T2
39	31	0.105105	T2
39	32	0.140679	T2
39	33	0.166311	T2
39	34	0.142895	T2
39	35	0.232321	T2
39	36	0.209821	T2
39	37	0.350143	T2
39	38	0.0846206	T2
39	39	0.121899	T2
39	40	0.189901	T2
39	41	0.132492	T2
39	42	0.335298	T2
39	43	0.121199	T2
39	44	0.355283	T2
39	45	0.109059	T2
39	46	0.116233	T2
39	47	0.218661	T2
39	48	0.147772	T2
39	49	0.197047	T2
39	50	0.13604	T2
39	51	0.230835	T2
39	52	0.175344	T2
39	53	0.151449	T2
39	54	0.191008	T2
39	55	0.113309	T2
39	56	0.360037	T2
39	57	0.109718	T2
39	58	0.180273	T2
39	59	0.240564	T2
39	60	0.130031	T2
39	61	0.159825	T2
39	62	0.149314	T2
39	63	0.115468	T2
39	64	0.146497	T2
39	65	0.227284	T2
39	66	0.139137	T2
39	67	0.132255	T2
39	68	0.132908	T2
39	69	0.142843	T2
39	70	0.149921	T2
39	71	0.0880441	T2
39	72	0.205943	T2
39	73	0.164841	T2
39	74	0.249567	T2
39	75	0.0996382	T2
39	76	0.0777491	T2
39	77	0.100591	T2
39	78	0.23257	T2
39	79	0.129081	T2
39	80	0.151954	T2
39	81	0.115724	T2
39	82	0.0948061	T2
39	83	0.113984	T2
39	84	0.126616	T2
39	85	0.197284	T2
39	86	0.149072	T2
39	87	0.159359	T2
39	88	0.0701227	T2
39	89	0.131489	T2
39	90	0.111303	T2
39	91	0.1522	T2
39	92	0.261179	T2
39	93	0.121578	T2
39	94	0.10476	T2
39	95	0.0980807	T2
39	96	0.112064	T2
40	1	0.0765057	T2
40	2	0.334638	T2
40	3	0.338129	T2
40	4	0.265863	T2
40	5	0.300582	T2
40	6	0.257526	T2
40	7	0.186084	T2
40	8	0.302376	T2
40	9	0.188549	T2
40	10	0.170235	T2
40	11	0.131998	T2
40	12	0.276075	T2
40	13	0.200785	T2
40	14	0.174672	T2
40	15	0.205629	T2
40	16	0.131683	T2
40	17	0.154011	T2
40	18	0.130351	T2
40	19	0.177544	T2
40	20	0.154115	T2
40	21	0.143112	T2
40	22	0.285716	T2
40	23	0.23721	T2
40	24	0.14313	T2
40	25	0.134984	T2
40	26	0.127936	T2
40	27	0.100679	T2
40	28	0.260702	T2
40	29	0.16936	T2
40	30	0.210257	T2
40	31	0.218414	T2
40	32	0.141081	T2
40	33	0.263484	T2
40	34	0.166739	T2
40	35	0.12212	T2
40	36	0.213225	T2
40	37	0.160531	T2
40	38	0.116367	T2
40	39	0.116633	T2
40	40	0.125057	T2
40	41	0.096424	T2
40	42	0.248821	T2
40	43	0.179277	T2
40	44	0.328035	T2
40	45	0.213748	T2
40	46	0.160802	T2
40	47	0.328811	T2
40	48	0.330651	T2
40	49	0.207126	T2
40	50	0.23628	T2
65	1	0.184978	WT
65	2	0.223287	WT
65	3	0.169082	WT
65	4	0.179312	WT
65	5	0.135204	WT
65	6	0.177716	WT
65	7	0.118007	WT
65	8	0.0931859	WT
65	9	0.179768	WT
65	10	0.118034	WT
65	11	0.115864	WT
65	12	0.183564	WT
65	13	0.193264	WT
65	14	0.107977	WT
65	15	0.112728	WT
65	16	0.177941	WT
65	17	0.246526	WT
65	18	0.0835394	WT
65	19	0.113059	WT
65	20	0.103107	WT
65	21	0.0957796	WT
65	22	0.0690895	WT
65	23	0.0871338	WT
65	24	0.194782	WT
65	25	0.121027	WT
65	26	0.0965209	WT
65	27	0.114984	WT
65	28	0.104145	WT
65	29	0.1732	WT
65	30	0.0755713	WT
65	31	0.105101	WT
65	32	0.123943	WT
65	33	0.0806693	WT
65	34	0.0960976	WT
65	35	0.126489	WT
65	36	0.0908898	WT
65	37	0.11941	WT
65	38	0.0752516	WT
65	39	0.109135	WT
65	40	0.0891902	WT
65	41	0.110037	WT
65	42	0.112845	WT
65	43	0.106381	WT
65	44	0.107121	WT
65	45	0.11679	WT
65	46	0.110073	WT
65	47	0.123429	WT
65	48	0.0975685	WT
65	49	0.188123	WT
65	50	0.0914385	WT
65	51	0.0913971	WT
65	52	0.0688907	WT
65	53	0.0890675	WT
65	54	0.0811154	WT
65	55	0.217215	WT
65	56	0.102194	WT
65	57	0.112892	WT
65	58	0.121615	WT
65	59	0.0873322	WT
65	60	0.0811937	WT
65	61	0.0814736	WT
65	62	0.0789467	WT
65	63	0.0843892	WT
65	64	0.0752811	WT
65	65	0.0775986	WT
65	66	0.0794883	WT
65	67	0.0765758	WT
65	68	0.173548	WT
65	69	0.0801214	WT
65	70	0.0808943	WT
65	71	0.0898377	WT
65	72	0.0712347	WT
65	73	0.0810211	WT
65	74	0.12245	WT
65	75	0.0892325	WT
65	76	0.0887704	WT
65	77	0.112523	WT
65	78	0.0576501	WT
65	79	0.170361	WT
65	80	0.102453	WT
65	81	0.0894608	WT
65	82	0.0710851	WT
65	83	0.0648539	WT
65	84	0.0697573	WT
65	85	0.0972302	WT
65	86	0.0596921	WT
65	87	0.0670878	WT
65	88	0.0716718	WT
65	89	0.0624583	WT
65	90	0.0996922	WT
65	91	0.0736424	WT
65	92	0.0774017	WT
65	93	0.050091	WT
65	94	0.0522631	WT
65	95	0.0413699	WT
65	96	0.0640254	WT
65	97	0.072918	WT
65	98	0.0573498	WT
66	1	0.206045	WT
66	2	0.233	WT
66	3	0.17601	WT
66	4	0.163466	WT
66	5	0.245326	WT
66	6	0.168344	WT
66	7	0.19534	WT
66	8	0.200148	WT
66	9	0.236544	WT
66	10	0.147984	WT
66	11	0.147191	WT
66	12	0.138925	WT
66	13	0.113602	WT
66	14	0.203154	WT
66	15	0.129373	WT
66	16	0.206868	WT
66	17	0.210211	WT
66	18	0.117335	WT
66	19	0.127877	WT
66	20	0.14267	WT
66	21	0.108474	WT
66	22	0.145419	WT
66	23	0.107	WT
66	24	0.141572	WT
66	25	0.104215	WT
66	26	0.137375	WT
66	27	0.124632	WT
66	28	0.112494	WT
66	29	0.135004	WT
66	30	0.111457	WT
66	31	0.102766	WT
66	32	0.122452	WT
66	33	0.120478	WT
66	34	0.110043	WT
66	35	0.102623	WT
66	36	0.0965162	WT
66	37	0.1142	WT
66	38	0.100002	WT
66	39	0.0956389	WT
66	40	0.0816731	WT
66	41	0.123274	WT
66	42	0.0980794	WT
66	43	0.112828	WT
66	44	0.110194	WT
66	45	0.10784	WT
66	46	0.102111	WT
66	47	0.12443	WT
66	48	0.0964974	WT
66	49	0.128274	WT
66	50	0.103419	WT
66	51	0.124444	WT
66	52	0.11444	WT
66	53	0.0637778	WT
66	54	0.127806	WT
66	55	0.097924	WT
66	56	0.104322	WT
66	57	0.11867	WT
66	58	0.0931692	WT
66	59	0.108695	WT
66	60	0.101238	WT
66	61	0.111029	WT
66	62	0.0734241	WT
66	63	0.0695767	WT
66	64	0.0944282	WT
66	65	0.0854892	WT
66	66	0.105049	WT
66	67	0.0999212	WT
66	68	0.113757	WT
66	69	0.0903899	WT
66	70	0.086487	WT
66	71	0.0904861	WT
66	72	0.0763203	WT
66	73	0.0938656	WT
66	74	0.0855261	WT
66	75	0.104638	WT
66	76	0.0990491	WT
66	77	0.0844123	WT
66	78	0.100526	WT
66	79	0.102514	WT
66	80	0.0822194	WT
66	81	0.0774441	WT
66	82	0.0817901	WT
66	83	0.0685275	WT
66	84	0.0752701	WT
66	85	0.0951972	WT
66	86	0.103854	WT
66	87	0.116841	WT
66	88	0.0792176	WT
66	89	0.0904246	WT
66	90	0.0825373	WT
66	91	0.0803199	WT
66	92	0.0886692	WT
66	93	0.0626488	WT
66	94	0.0744499	WT
66	95	0.11232	WT
66	96	0.066034	WT
66	97	0.107877	WT
66	98	0.154813	WT
66	99	0.0896523	WT
66	100	0.0832928	WT
66	101	0.0942862	WT
66	102	0.0652683	WT
66	103	0.0941174	WT
66	104	0.0874465	WT
67	1	0.0976101	WT
67	2	0.105399	WT
67	3	0.091092	WT
67	4	0.112425	WT
67	5	0.152199	WT
67	6	0.113834	WT
67	7	0.0657776	WT
67	8	0.0998172	WT
67	9	0.106583	WT
67	10	0.10488	WT
67	11	0.10532	WT
67	12	0.105322	WT
67	13	0.110538	WT
67	14	0.095281	WT
67	15	0.0980815	WT
67	16	0.111349	WT
67	17	0.101639	WT
67	18	0.0941835	WT
67	19	0.109823	WT
67	20	0.12011	WT
67	21	0.11046	WT
67	22	0.0973348	WT
67	23	0.116938	WT
67	24	0.106732	WT
67	25	0.125084	WT
67	26	0.0985443	WT
67	27	0.102672	WT
67	28	0.0896889	WT
67	29	0.0917744	WT
67	30	0.0937465	WT
67	31	0.109709	WT
67	32	0.0926907	WT
67	33	0.112378	WT
67	34	0.101121	WT
67	35	0.105569	WT
67	36	0.10563	WT
67	37	0.0905122	WT
67	38	0.0993637	WT
67	39	0.10574	WT
67	40	0.10253	WT
67	41	0.0773174	WT
67	42	0.0970669	WT
67	43	0.0956419	WT
67	44	0.0887502	WT
67	45	0.10324	WT
67	46	0.101334	WT
67	47	0.0944919	WT
67	48	0.090565	WT
67	49	0.0962442	WT
67	50	0.112623	WT
67	51	0.113547	WT
67	52	0.1192	WT
67	53	0.089823	WT
67	54	0.0974559	WT
67	55	0.0877951	WT
67	56	0.0976108	WT
67	57	0.103588	WT
67	58	0.0991114	WT
67	59	0.0971211	WT
67	60	0.0857441	WT
67	61	0.0861626	WT
67	62	0.101317	WT
67	63	0.0974429	WT
67	64	0.0919013	WT
67	65	0.0883489	WT
67	66	0.0860247	WT
67	67	0.0799784	WT
67	68	0.0809653	WT
67	69	0.0765883	WT
67	70	0.0830447	WT
67	71	0.0796944	WT
67	72	0.0523059	WT
67	73	0.0706126	WT
67	74	0.0991558	WT
67	75	0.0438277	WT
67	76	0.0676161	WT
67	77	0.055725	WT
67	78	0.0856503	WT
67	79	0.0822293	WT
67	80	0.0828911	WT
67	81	0.0683533	WT
67	82	0.0761607	WT
67	83	0.0745184	WT
67	84	0.0910749	WT
67	85	0.0734095	WT
67	86	0.0626568	WT
67	87	0.0832987	WT
67	88	0.0654579	WT
67	89	0.066238	WT
67	90	0.0838458	WT
67	91	0.0748643	WT
67	92	0.0766938	WT
67	93	0.0765837	WT
67	94	0.0646233	WT
67	95	0.0849922	WT
67	96	0.0780257	WT
67	97	0.0825432	WT
67	98	0.0479923	WT
67	99	0.0855978	WT
67	100	0.0489292	WT
67	101	0.07864	WT
67	102	0.057449	WT
67	103	0.0501274	WT
67	104	0.076805	WT
67	105	0.0620002	WT
67	106	0.0708254	WT
67	107	0.0698463	WT
67	108	0.0426738	WT
67	109	0.0409151	WT
67	110	0.0511678	WT
67	111	0.0659304	WT
67	112	0.066267	WT
67	113	0.0777711	WT
67	114	0.0521151	WT
67	115	0.0679359	WT
67	116	0.0655573	WT
67	117	0.0713186	WT
67	118	0.0699485	WT
67	119	0.0379131	WT
68	1	0.125362	WT
68	2	0.233998	WT
68	3	0.177623	WT
68	4	0.146859	WT
68	5	0.0998297	WT
68	6	0.080944	WT
68	7	0.124866	WT
68	8	0.116818	WT
68	9	0.0967197	WT
68	10	0.176414	WT
68	11	0.126655	WT
68	12	0.0935605	WT
68	13	0.0910706	WT
68	14	0.123836	WT
68	15	0.246574	WT
68	16	0.0813177	WT
68	17	0.0825949	WT
68	18	0.150582	WT
68	19	0.0703913	WT
68	20	0.0941874	WT
68	21	0.0925038	WT
68	22	0.0734038	WT
68	23	0.1925	WT
68	24	0.0650103	WT
68	25	0.0891939	WT
68	26	0.0741966	WT
68	27	0.0949128	WT
68	28	0.0752854	WT
68	29	0.0993205	WT
68	30	0.117743	WT
68	31	0.0916302	WT
68	32	0.088191	WT
68	33	0.0692881	WT
68	34	0.0772684	WT
68	35	0.076952	WT
68	36	0.0820661	WT
68	37	0.218382	WT
68	38	0.0693654	WT
68	39	0.083779	WT
68	40	0.0706541	WT
68	41	0.112551	WT
68	42	0.0881539	WT
68	43	0.0770031	WT
68	44	0.0898332	WT
68	45	0.073438	WT
68	46	0.0758715	WT
68	47	0.0902391	WT
68	48	0.0685435	WT
68	49	0.0860992	WT
68	50	0.0754276	WT
68	51	0.1573	WT
68	52	0.0823629	WT
68	53	0.110334	WT
68	54	0.0793749	WT
68	55	0.0807073	WT
68	56	0.0787262	WT
68	57	0.0678529	WT
68	58	0.0941956	WT
68	59	0.0836399	WT
68	60	0.0873263	WT
68	61	0.0981421	WT
68	62	0.0897411	WT
68	63	0.105724	WT
68	64	0.0795511	WT
68	65	0.0453108	WT
68	66	0.0831504	WT
68	67	0.0684847	WT
68	68	0.0892316	WT
68	69	0.0769524	WT
68	70	0.0781829	WT
68	71	0.103766	WT
68	72	0.0731994	WT
68	73	0.0670826	WT
68	74	0.0449168	WT
68	75	0.0894788	WT
68	76	0.0443766	WT
68	77	0.0775274	WT
68	78	0.111164	WT
68	79	0.0771039	WT
68	80	0.048345	WT
68	81	0.0696079	WT
68	82	0.0382699	WT
68	83	0.0989576	WT
68	84	0.0896023	WT
68	85	0.106918	WT
68	86	0.0585005	WT
68	87	0.0473047	WT
68	88	0.116013	WT
68	89	0.0375508	WT
68	90	0.0544858	WT
68	91	0.0610766	WT
68	92	0.0852958	WT
68	93	0.0729762	WT
68	94	0.0581123	WT
68	95	0.11553	WT
68	96	0.0568972	WT
68	97	0.0510103	WT
68	98	0.0737983	WT
68	99	0.160673	WT
68	100	0.0444037	WT
68	101	0.0762378	WT
68	102	0.0332199	WT
68	103	0.0622676	WT
68	104	0.133027	WT
68	105	0.0963387	WT
68	106	0.0447501	WT
68	107	0.075028	WT
68	108	0.0815868	WT
68	109	0.0651208	WT
69	1	0.14387	WT
69	2	0.176484	WT
69	3	0.146108	WT
69	4	0.15588	WT
69	5	0.144607	WT
69	6	0.137588	WT
69	7	0.146776	WT
69	8	0.173509	WT
69	9	0.184694	WT
69	10	0.146118	WT
69	11	0.125816	WT
69	12	0.143302	WT
69	13	0.192944	WT
69	14	0.156391	WT
69	15	0.158972	WT
69	16	0.148144	WT
69	17	0.154383	WT
69	18	0.159535	WT
69	19	0.144538	WT
69	20	0.158862	WT
69	21	0.0625763	WT
69	22	0.152725	WT
69	23	0.161585	WT
69	24	0.14783	WT
69	25	0.19161	WT
69	26	0.126081	WT
69	27	0.134222	WT
69	28	0.209455	WT
69	29	0.140933	WT
69	30	0.139444	WT
69	31	0.162354	WT
69	32	0.141299	WT
69	33	0.129809	WT
69	34	0.108427	WT
69	35	0.146332	WT
69	36	0.176217	WT
69	37	0.142633	WT
69	38	0.170589	WT
69	39	0.135184	WT
69	40	0.123181	WT
69	41	0.131517	WT
69	42	0.0931473	WT
69	43	0.125979	WT
69	44	0.113858	WT
69	45	0.146266	WT
69	46	0.14223	WT
69	47	0.112952	WT
69	48	0.155219	WT
69	49	0.0861386	WT
69	50	0.140068	WT
69	51	0.0803717	WT
69	52	0.142641	WT
69	53	0.111298	WT
69	54	0.120853	WT
69	55	0.141859	WT
69	56	0.15435	WT
69	57	0.091158	WT
69	58	0.113759	WT
69	59	0.128212	WT
69	60	0.119081	WT
69	61	0.127302	WT
69	62	0.139033	WT
69	63	0.130196	WT
69	64	0.120647	WT
69	65	0.104966	WT
69	66	0.103804	WT
69	67	0.104321	WT
69	68	0.105639	WT
69	69	0.126178	WT
69	70	0.105876	WT
69	71	0.107936	WT
69	72	0.0996373	WT
69	73	0.133481	WT
69	74	0.10631	WT
69	75	0.11332	WT
69	76	0.107927	WT
69	77	0.110714	WT
69	78	0.130317	WT
69	79	0.0874852	WT
69	80	0.118638	WT
69	81	0.102585	WT
69	82	0.0910767	WT
69	83	0.087571	WT
69	84	0.113584	WT
69	85	0.0734421	WT
69	86	0.133155	WT
69	87	0.0926392	WT
69	88	0.113918	WT
69	89	0.0821956	WT
69	90	0.178901	WT
69	91	0.111994	WT
69	92	0.101111	WT
69	93	0.155308	WT
69	94	0.0954145	WT
69	95	0.197199	WT
69	96	0.101111	WT
70	1	0.261803	WT
70	2	0.215758	WT
70	3	0.16383	WT
70	4	0.225887	WT
70	5	0.215836	WT
70	6	0.387398	WT
70	7	0.327694	WT
70	8	0.119952	WT
70	9	0.145053	WT
70	10	0.156598	WT
70	11	0.136851	WT
70	12	0.15068	WT
70	13	0.141183	WT
70	14	0.193079	WT
70	15	0.126424	WT
70	16	0.184104	WT
70	17	0.20672	WT
70	18	0.114253	WT
70	19	0.12358	WT
70	20	0.211262	WT
70	21	0.133583	WT
70	22	0.199266	WT
70	23	0.151917	WT
70	24	0.231598	WT
70	25	0.182146	WT
70	26	0.199454	WT
70	27	0.166671	WT
70	28	0.122826	WT
70	29	0.158032	WT
[truncated: 270 more rows]

## Sheet: Fig2
Fig. 2a										Fig.2e
m5C										DNA 5mC	Cells are harvested at indicated time post DOX-induced sgRNA expression in mESCs
	WT	Tet2 KO	Unpaired t test with Welch's correction
rep1	0.03948	0.04774	P value	0.0385							dCas13b-mut			dCas13b-WT				Statistics,unpaired t tests
rep2	0.03306	0.04802	P value summary	*						Time (h)	rep1	rep2	rep3	rep1	rep2	rep3		dCas13b-mut			dCas13b-WT
rep3	0.04282	0.05316	Significantly different? (P < 0.05)	Yes						0	1	1	1	1	1	1		Discovery?	P value		Discovery?	P value
			One- or two-tailed P value?	Two-tailed						4	0.732505	0.747855	0.983711	0.908088	1.17905	1.0195			0.0929228			0.674647
			Welch-corrected t, df	t=3.327 df=3.324						8	0.823539	0.869696	0.825792	0.926894	1.09048	0.958931		*	0.000436835			0.882284
										12	0.778961	0.859827	0.82027	0.918593	1.10978	1.00394		*	0.00151297			0.855038
										16	0.774122	0.563225	0.695941	0.890053	1.03968	1.05569		*	0.00636232			0.931032
										20	0.549462	0.657609	0.771878	1.10693	0.957426	1.05869		*	0.00608616			0.404531
										24	0.808109	0.720686	0.893492	1.1693	1.2378	1.39007			0.0181438			0.0151857
hm5C										36	0.712895	0.636659	0.653057	1.29054	1.54274	1.33884		*	0.00013702			0.00720445
	WT	Tet2 KO	Unpaired t test with Welch's correction							48	0.807101	0.602703	0.824645	1.3894	1.50324	1.32804			0.0231226		*	0.00137068
rep1	0.00274	0.00113	P value	0.0033						72	0.75535	0.84936	0.845565	1.45526	1.50964	1.46893		*	0.00396865		*	< 0.0001
rep2	0.00341	0.00143	P value summary	**
rep3	0.00328	0.00165	Significantly different? (P < 0.05)	Yes
			One- or two-tailed P value?	Two-tailed
			Welch-corrected t, df	t=6.836 df=3.672						RNA m5C	Cells are harvested at indicated time post DOX-induced sgRNA expression in mESCs
											dCas13b-mut			dCas13b-WT				Statistics,unpaired t tests
										Time (h)	rep1	rep2	rep3	rep1	rep2	rep3		dCas13b-mut			dCas13b-WT
										0	1	1	1	1	1	1		Discovery?	P value		Discovery?	P value
										4	0.988736	1.06303	1.22241	0.376357	0.374167	0.409089			0.255529		*	< 0.0001
										8	1.23414	1.0871	1.07651	0.391305	0.352488	0.419179			0.0596512		*	< 0.0001
										12	1.11663	1.09673	1.10969	0.462334	0.367898	0.401541		*	< 0.0001		*	< 0.0001
										16	1.07673	1.10757	1.25652	0.357424	0.381706	0.458733			0.0571544		*	< 0.0001
										20	0.979027	1.02612	1.1531	0.397433	0.301862	0.389669			0.367634		*	< 0.0001
										24	1.11752	0.939711	1.319	0.322799	0.354186	0.417268			0.316197		*	< 0.0001
										36	1.02182	1.03446	1.06594	0.400881	0.310287	0.371513			0.0360214		*	< 0.0001
										48	1.16314	1.0529	1.21644	0.323473	0.35472	0.413578			0.0401866		*	< 0.0001
										72	1.02103	1.13512	1.18897	0.319297	0.336231	0.4179			0.0808158		*	< 0.0001

## Sheet: Fig3
Fig. 3d							Fig. 3k
	rep1	rep2	rep3				Time (h)	H2AK119ub			ATAC
WT, no Dox	0.994	1.022	1.117				0	1.10397	1.00884	1.22493	0.920678	0.940024	1.15731
WT, +Dox	1.4922	1.3286	1.3221				2	0.670216	0.629683	0.713358	1.19812	0.871015	1.16535
Mut, no Dox	0.923	1.033	1.052				4	0.674877	0.563582	0.634063	1.36677	1.63668	1.32021
Mut, +Dox	0.9703	1.148	1.093				8	0.325944	0.245313	0.487238	1.80346	1.52707	2.17463
							12	0.182087	0.134222	0.148929	1.80346	2.75255	2.71466
WT, +Dox vs WT no Dox
Unpaired t test with Welch's correction
P value	0.0104						ATAC 4h vs 0h					H2AK119ub 4h vs 0h
P value summary	*						Unpaired t test with Welch's correction					Unpaired t test with Welch's correction
Significantly different? (P < 0.05)	Yes						P value	0.0061				P value	0.0277
One- or two-tailed P value?	Two-tailed						P value summary	**				P value summary	*
Welch-corrected t, df	t=5.028 df=3.491						Significantly different? (P < 0.05)	Yes				Significantly different? (P < 0.05)	Yes
							One- or two-tailed P value?	Two-tailed				One- or two-tailed P value?	Two-tailed
Mut, +Dox vs WT no Dox							Welch-corrected t, df	t=6.930 df=3.007				Welch-corrected t, df	t=3.497 df=3.752
Unpaired t test with Welch's correction
P value	0.3672
P value summary	ns
Significantly different? (P < 0.05)	No
One- or two-tailed P value?	Two-tailed
Welch-corrected t, df	t=1.024 df=3.745

## Sheet: Fig4
Fig.4b														Fig. 4c						Fig. 4e						Fig.4f														Fig.4g
Transplantation weeks	WT shctl			WT shMbd6			Tet2 KO shctl			Tet2 KO shMbd6				BM	WT shctl	WT shMbd6	Tet2-/- shctl	Tet2-/- shMbd6		Spleen/body w/w	WT shctl	WT shMbd6	Tet2-/- shctl	Tet2-/- shMbd6		# replating	WT shctl			WT shMbd6			Tet2-/- shctl			Tet2-/- shMbd6				CD11b+	WT shctl	WT shMbd6	Tet2-/- shctl	Tet2-/- shMbd6
1	5.26	6.39	6.18	4.62	3.81	6.22	6.37	5.85	6.63	6.55	5.4	5.24		rep1	4.24	4.44	39.1	5.37		rep1	0.00166	0.002124	0.002797	0.002183		1st	93	85	83	63	60	59	126	113	121	63	60	51		rep1	73.3	82.1	49.8	72.1
4	5.004	6.5	6.003	4.009	3.4	6.7	5.67	5.55	5.97	6.09	6.076	7.04		rep2	5.095	5.11	31.8	6.1		rep2	0.001877	0.002129	0.002946	0.001908		2nd	125	54	72	98	60	83	520	460	420	229	178	153		rep2	81	71.2	41.15	58.6
8	5.03	6.4	6.001	4.3	3.1	6.3	8.76	7.05	9.27	6.17	7.13	7.033		rep3	5.15	5.53	47.6	7.12		rep3	0.001978	0.001765	0.003106	0.001847		3rd	18	18	18	22	30	30	1327	1071	1215	350	283	226		rep3	82	72.7	44.2	61.9
12	5.001	6.8	6.002	4.02	3.01	7.001	13.57	12.1	14.88	7.076	7.038	8.019														4th	0	0	0	0	0	0	832	848	928	143	167	96
16	5.019	6.6	6.007	4.018	3.028	7.02	24.1	17.9	31.5	7.07	8.042	9.059		Unpaired t test with Welch's correction				Tet2-/- shctl		Unpaired t test with Welch's correction				Tet2-/- shctl																Unpaired t test with Welch's correction				WT shMbd6
20	5.02	7.2	7.002	4.004	3.4	7.2	46.6	29.1	49.7	8.04	9.009	11.015		P value	0.0166			vs.		P value	0.001			vs.		Unpaired t test with Welch's correction	WT shCtl vs WT shMbd6			Unpaired t test with Welch's correction	Tet2-/- shCtl vs Tet2-/- shMbd6									P value	0.4788			vs.
24	5.81	7.5	7.08	4.27	3.76	7.1	54.4	38	58	8.03	9.88	12.8		P value summary	*			WT shctl		P value summary	**			WT shctl		1st	P > 0.05			1st	P > 0.05									P value summary	ns			WT shctl
														Significantly different? (P < 0.05)	Yes					Significantly different? (P < 0.05)	Yes					2nd	P > 0.05			2nd	P < 0.0001									Significantly different? (P < 0.05)	No
														One- or two-tailed P value?	Two-tailed					One- or two-tailed P value?	Two-tailed					3rd	P > 0.05			3rd	P < 0.0001									One- or two-tailed P value?	Two-tailed
Multiple t tests, Tet2 KO shCtl vs WT shCtl														Welch-corrected t, df	t=7.579 df=2.017					Welch-corrected t, df	t=8.584 df=3.990					4th	P > 0.05			4th	P < 0.0001									Welch-corrected t, df	t=0.7838 df=3.827
Transplantation weeks	P value
1	0.306151													Unpaired t test with Welch's correction				Tet2-/- shMbd6		Unpaired t test with Welch's correction				Tet2-/- shMbd6																Unpaired t test with Welch's correction				Tet2-/- shMbd6
4	0.121353													P value	0.0173			vs.		P value	0.0022			vs.																P value	0.0228			vs.
8	0.0984502													P value summary	*			Tet2-/- shctl		P value summary	**			Tet2-/- shctl																P value summary	*			Tet2-/- shctl
12	0.00207894													Significantly different? (P < 0.05)	Yes					Significantly different? (P < 0.05)	Yes																			Significantly different? (P < 0.05)	Yes
16	0.0143893													One- or two-tailed P value?	Two-tailed					One- or two-tailed P value?	Two-tailed																			One- or two-tailed P value?	Two-tailed
20	0.0074222													Welch-corrected t, df	t=7.250 df=2.049					Welch-corrected t, df	t=7.107 df=3.917																			Welch-corrected t, df	t=4.000 df=3.350
24	0.00320098
														PB	WT shctl	WT shMbd6	Tet2-/- shctl	Tet2-/- shMbd6																						Lin-ckit+	WT shctl	WT shMbd6	Tet2-/- shctl	Tet2-/- shMbd6
														rep1	2.19	2.33	14.7	2.3																						rep1	5.55	5.58	30.9	16.2
														rep2	1.78	1.83	15.7	3.11																						rep2	11.3	11.9	25.3	13.4
														rep3	2.047	2.1	19.2	3.4																						rep3	15	17.8	37.6	10.2
														Unpaired t test with Welch's correction				Tet2-/- shctl																						Unpaired t test with Welch's correction				WT shMbd6
														P value	0.0083			vs.																						P value	0.8116			vs.
														P value summary	**			WT shctl																						P value summary	ns			WT shctl
														Significantly different? (P < 0.05)	Yes																									Significantly different? (P < 0.05)	No
														One- or two-tailed P value?	Two-tailed																									One- or two-tailed P value?	Two-tailed
														Welch-corrected t, df	t=10.61 df=2.031																									Welch-corrected t, df	t=0.2556 df=3.775
														Unpaired t test with Welch's correction				Tet2-/- shMbd6																						Unpaired t test with Welch's correction				Tet2-/- shMbd6
														P value	0.0072			vs.																						P value	0.0214			vs.
														P value summary	**			Tet2-/- shctl																						P value summary	*			Tet2-/- shctl
														Significantly different? (P < 0.05)	Yes																									Significantly different? (P < 0.05)	Yes
														One- or two-tailed P value?	Two-tailed																									One- or two-tailed P value?	Two-tailed
														Welch-corrected t, df	t=9.689 df=2.232																									Welch-corrected t, df	t=4.551 df=2.900

## Sheet: Fig5
Fig.5a														Fig.5b						Fig.5c
K-562	TET2 WT, shCtrl			TET2 KO, shCtrl			TET2 WT, shMBD6			TET2 KO, shMBD6				H2AK119ub/GAPDH	TET2 WT shNC	TET2 WT, shMBD6	TET2 KO shNC	TET2 KO shMBD6		K-562	WT shctl	Tet2-/- shctl	WT shMbd6	Tet2-/- shMbd6
	mean	sd	n	mean	sd	n	mean	sd	n	mean	sd	n		rep1	0.883	1.204	0.52	0.903		28	1				Log-rank (Mantel-Cox) test
Day1	1	0.0432	4	1	0.0554	4	1	0.0623	4	1	0.0228	4		rep2	0.982	1.429	0.396	1.205		35	1	1			Chi square	9.701
Day2	4.12	0.2989	4	3.985	0.2546	4	2.356	0.2364	4	1.546	0.0895	4		rep3	1.204	1.593	0.405	1.004		35		1			df	1
Day3	8.054	0.1128	4	7.546	0.365	4	3.568	0.1245	4	1.954	0.158	4								38		1			P value	0.0018
Day4	11.2	0.1235	4	10.5	0.4322	4	4.52	0.2342	4	2.36	0.2785	4		Unpaired t test			TET2 WT shNC			39	1				P value summary	**
														P value	0.0048		vs.			39	1				Are the survival curves sig different?	Yes
Multiple t tests						Multiple t tests								P value summary	**		TET2 KO shNC			39	1
TET2 WT shCtrl	P value					TET2 WT shMBD6	P value							Significantly different? (P < 0.05)	Yes					47		1
vs	> 0.9999					vs	> 0.9999							One- or two-tailed P value?	Two-tailed					53		1
TET2 KO shCtrl	0.517353					TET2 KO shMBD6	0.000680631							t, df	t=5.659 df=4					125			1
	0.0375511						< 0.0001													128			1
	0.0207275						< 0.0001							Unpaired t test			TET2 KO shNC			130			1
														P value	0.0036		vs.			132			1
K-562	TET2 WT, shCtrl			TET2 KO, shCtrl			TET2 WT, shMBD6			TET2 KO, shMBD6				P value summary	**		TET2 KO shMBD6			135			1
	mean	sd	n	mean	sd	n	mean	sd	n	mean	sd	n		Significantly different? (P < 0.05)	Yes					163				1
Day1	1	0.1656	4	1	0.1496	4	1	0.0985	4	1	0.0856	4		One- or two-tailed P value?	Two-tailed					185				1
Day2	1.549	0.1458	4	1.536	0.2015	4	1.398	0.1284	4	1.265	0.1288	4		t, df	t=6.134 df=4					197				1
Day3	2.368	0.1699	4	2.168	0.1689	4	1.735	0.1654	4	1.456	0.1222	4								210				1
Day4	3.254	0.1457	4	3.154	0.1954	4	2.265	0.1874	4	1.687	0.0879	4								220				1
Multiple t tests						Multiple t tests
TET2 WT shCtrl	P value					TET2 WT shMBD6	P value													THP-1	WT shctl	Tet2-/-shctl	WT shMbd6	Tet2-/- shMbd6	Log-rank (Mantel-Cox) test
vs	> 0.9999					vs	> 0.9999													20	1				Chi square	6.215
TET2 KO shCtrl	0.92015					TET2 KO shMBD6	0.193899													20	1				df	1
	0.146024						0.0349473													21	1	1			P value	0.0127
	0.443277						0.00140035													22	1	1			P value summary	*
																				22	1	1			Are the survival curves sig different?	Yes
																				23		1
																				23		1
																				51			1
																				54			1
																				60			1
																				110				1
																				115			1
																				117			1
																				138				1
																				141				1
																				160				0
																				160				0

## Sheet: ED1
ED1a						ED1j				ED1k				ED1l						ED1m	OEC: OE control, OEW: OE WT Pspc1, OEM: OE mutant Pspc1
%mutation ratio	TET1	TET2	TET3	NT		5mC/C	WT	Pspc1 KO		ATAC signal	WT	Pspc1 KO		ImageNumber	ObjectNumber	Metadata_Cell	Intensity/Area	Wilcoxon test:		ImageNumber	ObjectNumber	Metadata_Cell	Metadata_condition	Intensity/Area	Wilcoxon test:
Myelodysplastic Syndromes (MDS IWG, IPSSM, NEJM Evidence 2022)	0	31.6281	0	68.3719		rep1	0.996089	1.01943		image1	0.119185	0.132724		1	1	CTRL	0.0606128	KO vs CTRL: <2.2e-16		11	1	KO	OEC	0.07864	OEW vs CTRL: <2.2e-16
Myeloproliferative Neoplasms (CIMR, NEJM 2013)	0	13.9073	0	86.0927		rep2	1.02575	1.03132		image2	0.073198	0.122186		1	2	CTRL	0.0773091			11	2	KO	OEC	0.113098	OEM vs CTRL: <2.2e-16
Acute Myeloid Leukemia (OHSU, Nature 2018)	0.160772	12.2187	0.160772	87.4598		rep3	0.978451	1.00404		image3	0.074987	0.119475		1	3	CTRL	0.0827198			11	3	KO	OEC	0.0935815
										image4	0.069655	0.144253		1	4	CTRL	0.0824764			11	4	KO	OEC	0.123266
						Unpaired t test with Welch's correction		Pspc1 KO		image5	0.064252	0.28027		1	5	CTRL	0.0895443			11	5	KO	OEC	0.113772
						P value	0.3319	vs.		image6	0.050119	0.1635		1	6	CTRL	0.0815797			11	6	KO	OEC	0.112908
						P value summary	ns	WT		image7	0.05174	0.204068		1	7	CTRL	0.0744099			11	7	KO	OEC	0.117428
						Significantly different? (P < 0.05)	No							1	8	CTRL	0.0700214			11	8	KO	OEC	0.111767
						One- or two-tailed P value?	Two-tailed			Unpaired t test with Welch's correction		Pspc1 KO		1	9	CTRL	0.054308			11	9	KO	OEC	0.113158
						Welch-corrected t, df	t=1.142 df=3.183			P value	0.004	vs.		1	10	CTRL	0.052787			11	10	KO	OEC	0.0949272
										P value summary	**	WT		1	11	CTRL	0.062178			11	11	KO	OEC	0.132704
										Significantly different? (P < 0.05)	Yes			1	12	CTRL	0.0710581			11	12	KO	OEC	0.131063
						5mC/C	WT	Pspc1 KO		One- or two-tailed P value?	Two-tailed			1	13	CTRL	0.0544366			11	13	KO	OEC	0.143083
						rep1	1.03494	1.19062		Welch-corrected t, df	t=4.018 df=7.852			1	14	CTRL	0.0850746			11	14	KO	OEC	0.126188
						rep2	0.963465	1.133						1	15	CTRL	0.0819468			12	1	KO	OEC	0.071207
						rep3	0.999318	1.12296						1	16	CTRL	0.0758966			12	2	KO	OEC	0.0611208
														1	17	CTRL	0.0580618			12	3	KO	OEC	0.0687265
						Unpaired t test with Welch's correction		Pspc1 KO						1	18	CTRL	0.0535523			12	4	KO	OEC	0.078027
						P value	0.0071	vs.						1	19	CTRL	0.062354			12	5	KO	OEC	0.0775921
						P value summary	**	WT						1	20	CTRL	0.0676799			12	6	KO	OEC	0.0669568
						Significantly different? (P < 0.05)	Yes							1	21	CTRL	0.0669077			12	7	KO	OEC	0.0493486
						One- or two-tailed P value?	Two-tailed							1	22	CTRL	0.0589856			12	8	KO	OEC	0.0786662
						Welch-corrected t, df	t=5.072 df=3.998							1	23	CTRL	0.0752191			12	9	KO	OEC	0.0655682
														1	24	CTRL	0.0577551			12	10	KO	OEC	0.0538873
														1	25	CTRL	0.0685286			13	1	KO	OEC	0.106623
														1	26	CTRL	0.070103			13	2	KO	OEC	0.0787349
														1	27	CTRL	0.08287			13	3	KO	OEC	0.0995745
														1	28	CTRL	0.0789724			13	4	KO	OEC	0.0555443
														1	29	CTRL	0.0860337			13	5	KO	OEC	0.0928532
														1	30	CTRL	0.0717992			13	6	KO	OEC	0.0742915
														1	31	CTRL	0.0923415			13	7	KO	OEC	0.0779633
														1	32	CTRL	0.109492			13	8	KO	OEC	0.0648791
														1	33	CTRL	0.093202			13	9	KO	OEC	0.0909659
														1	34	CTRL	0.0693565			13	10	KO	OEC	0.0703286
														1	35	CTRL	0.098514			13	11	KO	OEC	0.0978849
														1	36	CTRL	0.0989963			13	12	KO	OEC	0.073304
														1	37	CTRL	0.0788695			13	13	KO	OEC	0.0630783
														1	38	CTRL	0.0819415			13	14	KO	OEC	0.0756058
														1	39	CTRL	0.084692			13	15	KO	OEC	0.119279
														1	40	CTRL	0.10404			13	16	KO	OEC	0.0901136
														1	41	CTRL	0.0878057			13	17	KO	OEC	0.0894004
														1	42	CTRL	0.0825048			13	18	KO	OEC	0.0948689
														1	43	CTRL	0.110232			13	19	KO	OEC	0.0797377
														1	44	CTRL	0.0841833			13	20	KO	OEC	0.0794464
														1	45	CTRL	0.0725862			13	21	KO	OEC	0.0694271
														1	46	CTRL	0.103179			13	22	KO	OEC	0.0958441
														1	47	CTRL	0.106604			13	23	KO	OEC	0.0829492
														1	48	CTRL	0.0880518			13	24	KO	OEC	0.0936717
														1	49	CTRL	0.0351415			13	25	KO	OEC	0.080534
														1	50	CTRL	0.089386			13	26	KO	OEC	0.0697721
														2	1	CTRL	0.0665354			13	27	KO	OEC	0.0773306
														2	2	CTRL	0.0575551			13	28	KO	OEC	0.0790406
														2	3	CTRL	0.0584458			13	29	KO	OEC	0.0957288
														2	4	CTRL	0.0621153			13	30	KO	OEC	0.0879628
														2	5	CTRL	0.0737355			13	31	KO	OEC	0.0947864
														2	6	CTRL	0.056423			13	32	KO	OEC	0.0727639
														2	7	CTRL	0.0782202			13	33	KO	OEC	0.0860639
														2	8	CTRL	0.0681969			13	34	KO	OEC	0.0900035
														2	9	CTRL	0.0634098			13	35	KO	OEC	0.0877226
														2	10	CTRL	0.0824629			13	36	KO	OEC	0.103194
														2	11	CTRL	0.0575148			13	37	KO	OEC	0.100158
														2	12	CTRL	0.0671598			13	38	KO	OEC	0.0833187
														2	13	CTRL	0.0565948			13	39	KO	OEC	0.0435384
														2	14	CTRL	0.0702683			13	40	KO	OEC	0.0734827
														2	15	CTRL	0.0743252			13	41	KO	OEC	0.0773878
														2	16	CTRL	0.0681122			13	42	KO	OEC	0.0866777
														2	17	CTRL	0.0737188			13	43	KO	OEC	0.0684083
														2	18	CTRL	0.0537573			13	44	KO	OEC	0.0782123
														2	19	CTRL	0.071628			13	45	KO	OEC	0.0573992
														2	20	CTRL	0.0906318			13	46	KO	OEC	0.0737308
														2	21	CTRL	0.088585			14	1	KO	OEC	0.093828
														2	22	CTRL	0.0634696			14	2	KO	OEC	0.0851994
														2	23	CTRL	0.0842316			14	3	KO	OEC	0.097608
														2	24	CTRL	0.0733413			14	4	KO	OEC	0.0969199
														2	25	CTRL	0.0640425			14	5	KO	OEC	0.088525
														2	26	CTRL	0.0510558			14	6	KO	OEC	0.0759541
														2	27	CTRL	0.0584978			14	7	KO	OEC	0.073427
														2	28	CTRL	0.0648124			14	8	KO	OEC	0.0795917
														2	29	CTRL	0.0584223			14	9	KO	OEC	0.0833419
														2	30	CTRL	0.0767161			14	10	KO	OEC	0.117638
														2	31	CTRL	0.058316			14	11	KO	OEC	0.0789761
														2	32	CTRL	0.0639516			14	12	KO	OEC	0.0800503
														2	33	CTRL	0.0638964			14	13	KO	OEC	0.0815053
														2	34	CTRL	0.0874672			14	14	KO	OEC	0.101564
														2	35	CTRL	0.0631184			14	15	KO	OEC	0.0867158
														2	36	CTRL	0.0757545			14	16	KO	OEC	0.0862651
														2	37	CTRL	0.102927			14	17	KO	OEC	0.0819092
														2	38	CTRL	0.0640823			14	18	KO	OEC	0.0804561
														2	39	CTRL	0.0572618			14	19	KO	OEC	0.10944
														2	40	CTRL	0.0653058			14	20	KO	OEC	0.0647155
														2	41	CTRL	0.0916048			14	21	KO	OEC	0.0802127
														2	42	CTRL	0.0754396			14	22	KO	OEC	0.0948408
														2	43	CTRL	0.0553242			14	23	KO	OEC	0.0966192
														2	44	CTRL	0.044441			14	24	KO	OEC	0.0887047
														2	45	CTRL	0.0639198			14	25	KO	OEC	0.0814655
														2	46	CTRL	0.0662481			14	26	KO	OEC	0.0854117
														2	47	CTRL	0.0549142			14	27	KO	OEC	0.0750984
														2	48	CTRL	0.0655918			14	28	KO	OEC	0.0896324
														2	49	CTRL	0.0774027			14	29	KO	OEC	0.107941
														2	50	CTRL	0.0625191			14	30	KO	OEC	0.104978
														2	51	CTRL	0.0473062			14	31	KO	OEC	0.0912219
														2	52	CTRL	0.0570778			14	32	KO	OEC	0.0933652
														3	1	CTRL	0.079708			14	33	KO	OEC	0.0730594
														3	2	CTRL	0.090674			14	34	KO	OEC	0.0854133
														3	3	CTRL	0.0793434			14	35	KO	OEC	0.0771908
														3	4	CTRL	0.0986512			14	36	KO	OEC	0.0995784
														3	5	CTRL	0.0821738			14	37	KO	OEC	0.0769474
														3	6	CTRL	0.0974115			14	38	KO	OEC	0.0788271
														3	7	CTRL	0.0703758			14	39	KO	OEC	0.0769944
														3	8	CTRL	0.0858091			14	40	KO	OEC	0.0773631
														3	9	CTRL	0.081911			14	41	KO	OEC	0.0673964
														3	10	CTRL	0.0730444			14	42	KO	OEC	0.0701589
														3	11	CTRL	0.0627114			14	43	KO	OEC	0.113844
														3	12	CTRL	0.0927353			14	44	KO	OEC	0.0668154
														3	13	CTRL	0.0697828			14	45	KO	OEC	0.0850962
														3	14	CTRL	0.0688211			14	46	KO	OEC	0.084504
														3	15	CTRL	0.0751638			14	47	KO	OEC	0.106476
														3	16	CTRL	0.091596			14	48	KO	OEC	0.0761945
														3	17	CTRL	0.048627			14	49	KO	OEC	0.0948715
														3	18	CTRL	0.095035			14	50	KO	OEC	0.0711904
														3	19	CTRL	0.0657101			14	51	KO	OEC	0.0764661
														3	20	CTRL	0.0634177			14	52	KO	OEC	0.0746054
														3	21	CTRL	0.047304			15	1	KO	OEC	0.0837811
														3	22	CTRL	0.07882			15	2	KO	OEC	0.081116
														3	23	CTRL	0.0760305			15	3	KO	OEC	0.112696
														3	24	CTRL	0.0859675			15	4	KO	OEC	0.0786741
														3	25	CTRL	0.0915657			15	5	KO	OEC	0.0565513
														3	26	CTRL	0.0834519			15	6	KO	OEC	0.0926111
														3	27	CTRL	0.0724862			15	7	KO	OEC	0.0970645
														3	28	CTRL	0.0809386			15	8	KO	OEC	0.0736429
														3	29	CTRL	0.0940122			15	9	KO	OEC	0.0680275
														3	30	CTRL	0.0931723			15	10	KO	OEC	0.075361
														3	31	CTRL	0.0767365			15	11	KO	OEC	0.0946141
														3	32	CTRL	0.10944			15	12	KO	OEC	0.100446
														3	33	CTRL	0.093894			15	13	KO	OEC	0.0912591
														3	34	CTRL	0.0670653			15	14	KO	OEC	0.0871865
														3	35	CTRL	0.093605			15	15	KO	OEC	0.0637818
														3	36	CTRL	0.0909543			15	16	KO	OEC	0.0836035
														3	37	CTRL	0.0798964			15	17	KO	OEC	0.046145
														3	38	CTRL	0.0891362			15	18	KO	OEC	0.0931326
														3	39	CTRL	0.0755517			15	19	KO	OEC	0.065138
														3	40	CTRL	0.0922218			15	20	KO	OEC	0.0996183
														3	41	CTRL	0.093975			15	21	KO	OEC	0.0626409
														3	42	CTRL	0.0861995			15	22	KO	OEC	0.0913822
														3	43	CTRL	0.0934515			15	23	KO	OEC	0.0793452
														3	44	CTRL	0.0836724			15	24	KO	OEC	0.0829502
														3	45	CTRL	0.0556287			15	25	KO	OEC	0.0678252
														3	46	CTRL	0.0957697			15	26	KO	OEC	0.0854613
														3	47	CTRL	0.0774221			15	27	KO	OEC	0.0467546
														3	48	CTRL	0.080289			15	28	KO	OEC	0.0769857
														3	49	CTRL	0.0996878			15	29	KO	OEC	0.100256
														3	50	CTRL	0.0804544			15	30	KO	OEC	0.0785328
														3	51	CTRL	0.0811903			15	31	KO	OEC	0.0871857
														3	52	CTRL	0.080352			15	32	KO	OEC	0.0948141
														3	53	CTRL	0.0817181			15	33	KO	OEC	0.0894545
														3	54	CTRL	0.0829275			15	34	KO	OEC	0.0820321
														3	55	CTRL	0.102557			15	35	KO	OEC	0.0877609
														3	56	CTRL	0.086408			15	36	KO	OEC	0.0761269
														3	57	CTRL	0.0875349			15	37	KO	OEC	0.110798
														3	58	CTRL	0.0650988			15	38	KO	OEC	0.0998075
														3	59	CTRL	0.081368			15	39	KO	OEC	0.0906178
														3	60	CTRL	0.143739			15	40	KO	OEC	0.0908196
														3	61	CTRL	0.144156			15	41	KO	OEC	0.10084
														3	62	CTRL	0.086013			15	42	KO	OEC	0.090759
														4	1	CTRL	0.0640843			15	43	KO	OEC	0.0877013
														4	2	CTRL	0.0607769			15	44	KO	OEC	0.0837257
														4	3	CTRL	0.077737			15	45	KO	OEC	0.105899
														4	4	CTRL	0.0620413			15	46	KO	OEC	0.0878665
														4	5	CTRL	0.056899			15	47	KO	OEC	0.0779287
														4	6	CTRL	0.0363147			15	48	KO	OEC	0.0846433
														4	7	CTRL	0.0417596			15	49	KO	OEC	0.0956616
														4	8	CTRL	0.0591624			15	50	KO	OEC	0.0760443
														4	9	CTRL	0.0591591			15	51	KO	OEC	0.076739
														4	10	CTRL	0.0548589			16	1	KO	OEC	0.0701271
														4	11	CTRL	0.0608971			16	2	KO	OEC	0.0810515
														4	12	CTRL	0.0502964			16	3	KO	OEC	0.070613
														4	13	CTRL	0.0635145			16	4	KO	OEC	0.0922042
														4	14	CTRL	0.051548			16	5	KO	OEC	0.0734216
														4	15	CTRL	0.0423828			16	6	KO	OEC	0.0982751
														4	16	CTRL	0.0548416			16	7	KO	OEC	0.0755309
														4	17	CTRL	0.0569029			16	8	KO	OEC	0.0828648
														4	18	CTRL	0.0578638			16	9	KO	OEC	0.072891
														4	19	CTRL	0.0683123			16	10	KO	OEC	0.0700407
														4	20	CTRL	0.0623291			16	11	KO	OEC	0.0740678
														4	21	CTRL	0.0568086			16	12	KO	OEC	0.0769779
														4	22	CTRL	0.0828227			16	13	KO	OEC	0.0743678
														4	23	CTRL	0.061173			16	14	KO	OEC	0.0925035
														4	24	CTRL	0.049076			16	15	KO	OEC	0.0800348
														4	25	CTRL	0.0714055			16	16	KO	OEC	0.0878717
														4	26	CTRL	0.0601689			16	17	KO	OEC	0.0673771
														4	27	CTRL	0.0491205			16	18	KO	OEC	0.0760895
														4	28	CTRL	0.0570194			16	19	KO	OEC	0.0698939
														4	29	CTRL	0.061682			16	20	KO	OEC	0.0659219
														4	30	CTRL	0.0464144			16	21	KO	OEC	0.0892119
														4	31	CTRL	0.0853924			16	22	KO	OEC	0.0683371
														4	32	CTRL	0.0617547			16	23	KO	OEC	0.0747793
														4	33	CTRL	0.0582624			16	24	KO	OEC	0.0663874
														4	34	CTRL	0.106269			16	25	KO	OEC	0.0808752
														4	35	CTRL	0.0860213			16	26	KO	OEC	0.0924054
														4	36	CTRL	0.0509507			16	27	KO	OEC	0.0807645
														4	37	CTRL	0.0718988			16	28	KO	OEC	0.0837257
														4	38	CTRL	0.0658575			16	29	KO	OEC	0.0801569
														4	39	CTRL	0.0774045			16	30	KO	OEC	0.0867733
														4	40	CTRL	0.0522097			16	31	KO	OEC	0.0786321
														4	41	CTRL	0.0779903			16	32	KO	OEC	0.0704704
														4	42	CTRL	0.0737635			16	33	KO	OEC	0.0637015
														4	43	CTRL	0.0779235			16	34	KO	OEC	0.0908643
														4	44	CTRL	0.0606985			16	35	KO	OEC	0.0813809
														4	45	CTRL	0.0662153			16	36	KO	OEC	0.0701275
														4	46	CTRL	0.0617799			17	1	KO	OEC	0.102902
														4	47	CTRL	0.0838931			17	2	KO	OEC	0.0740843
														4	48	CTRL	0.0736428			17	3	KO	OEC	0.0781706
														4	49	CTRL	0.0660982			17	4	KO	OEC	0.103142
														4	50	CTRL	0.0705108			17	5	KO	OEC	0.0898008
														4	51	CTRL	0.0573423			17	6	KO	OEC	0.0813994
														4	52	CTRL	0.0847066			17	7	KO	OEC	0.098524
														4	53	CTRL	0.0687007			17	8	KO	OEC	0.0768072
														4	54	CTRL	0.0747871			17	9	KO	OEC	0.0853061
														4	55	CTRL	0.0672861			17	10	KO	OEC	0.0841921
														4	56	CTRL	0.0712535			17	11	KO	OEC	0.0792238
														4	57	CTRL	0.0813888			17	12	KO	OEC	0.107678
														4	58	CTRL	0.0646011			17	13	KO	OEC	0.0863902
														4	59	CTRL	0.0951392			17	14	KO	OEC	0.104427
														4	60	CTRL	0.078514			17	15	KO	OEC	0.0881528
														4	61	CTRL	0.0797135			17	16	KO	OEC	0.0709238
														4	62	CTRL	0.0749211			17	17	KO	OEC	0.0739115
														4	63	CTRL	0.0677617			17	18	KO	OEC	0.0768686
														4	64	CTRL	0.0619845			17	19	KO	OEC	0.102632
														4	65	CTRL	0.046149			17	20	KO	OEC	0.0915978
														4	66	CTRL	0.0713855			17	21	KO	OEC	0.0835432
														4	67	CTRL	0.0748523			17	22	KO	OEC	0.0987723
														4	68	CTRL	0.0869401			17	23	KO	OEC	0.0900848
														4	69	CTRL	0.112748			17	24	KO	OEC	0.07743
														4	70	CTRL	0.0791211			17	25	KO	OEC	0.0890716
														5	1	CTRL	0.0764051			17	26	KO	OEC	0.0944118
														5	2	CTRL	0.0783656			17	27	KO	OEC	0.0883149
														5	3	CTRL	0.103946			17	28	KO	OEC	0.0916121
														5	4	CTRL	0.113432			17	29	KO	OEC	0.0733883
														5	5	CTRL	0.103187			17	30	KO	OEC	0.0841194
														5	6	CTRL	0.105951			17	31	KO	OEC	0.0790182
														5	7	CTRL	0.0839399			17	32	KO	OEC	0.0685767
														5	8	CTRL	0.0739813			17	33	KO	OEC	0.0762205
														5	9	CTRL	0.145201			17	34	KO	OEC	0.0848384
														5	10	CTRL	0.0665665			17	35	KO	OEC	0.075955
														5	11	CTRL	0.0834939			17	36	KO	OEC	0.0881245
														5	12	CTRL	0.0811394			17	37	KO	OEC	0.0609519
														5	13	CTRL	0.123782			17	38	KO	OEC	0.0635543
														5	14	CTRL	0.0875634			17	39	KO	OEC	0.0774292
														5	15	CTRL	0.0802871			17	40	KO	OEC	0.0770855
														5	16	CTRL	0.0851535			17	41	KO	OEC	0.0917289
														5	17	CTRL	0.0870764			17	42	KO	OEC	0.0703979
														5	18	CTRL	0.0679842			18	1	KO	OEC	0.0778434
														5	19	CTRL	0.0979494			18	2	KO	OEC	0.0650568
														5	20	CTRL	0.0900677			18	3	KO	OEC	0.084753
														5	21	CTRL	0.076636			18	4	KO	OEC	0.0971703
														5	22	CTRL	0.0788726			18	5	KO	OEC	0.0789384
														5	23	CTRL	0.060577			18	6	KO	OEC	0.122148
														5	24	CTRL	0.0552408			18	7	KO	OEC	0.0794918
														5	25	CTRL	0.0573737			18	8	KO	OEC	0.0878125
														5	26	CTRL	0.0585136			18	9	KO	OEC	0.0756909
														5	27	CTRL	0.0567928			18	10	KO	OEC	0.0638316
														5	28	CTRL	0.058619			18	11	KO	OEC	0.0562049
														5	29	CTRL	0.0683565			18	12	KO	OEC	0.0944482
														5	30	CTRL	0.0687098			18	13	KO	OEC	0.0572074
														5	31	CTRL	0.0650722			18	14	KO	OEC	0.0772454
														5	32	CTRL	0.06527			18	15	KO	OEC	0.109682
														5	33	CTRL	0.0586157			18	16	KO	OEC	0.0672487
														5	34	CTRL	0.0529854			18	17	KO	OEC	0.0876109
														5	35	CTRL	0.0383824			18	18	KO	OEC	0.0829088
														5	36	CTRL	0.0592624			18	19	KO	OEC	0.0739008
														6	1	CTRL	0.129464			18	20	KO	OEC	0.0584573
														6	2	CTRL	0.0673622			18	21	KO	OEC	0.0806186
														6	3	CTRL	0.106576			18	22	KO	OEC	0.0988333
														6	4	CTRL	0.0970113			18	23	KO	OEC	0.0589334
														6	5	CTRL	0.0975312			18	24	KO	OEC	0.0619703
														6	6	CTRL	0.106234			18	25	KO	OEC	0.097289
														6	7	CTRL	0.0720868			18	26	KO	OEC	0.0682002
														6	8	CTRL	0.102098			18	27	KO	OEC	0.0704704
														6	9	CTRL	0.111718			18	28	KO	OEC	0.078452
														6	10	CTRL	0.0852063			18	29	KO	OEC	0.0746053
														6	11	CTRL	0.0995735			19	1	KO	OEC	0.0864424
														6	12	CTRL	0.106243			19	2	KO	OEC	0.0865135
														6	13	CTRL	0.0887218			19	3	KO	OEC	0.0557604
														6	14	CTRL	0.0995598			19	4	KO	OEC	0.0708247
														6	15	CTRL	0.0987645			19	5	KO	OEC	0.0878746
														6	16	CTRL	0.0814975			19	6	KO	OEC	0.0918615
														6	17	CTRL	0.0799255			19	7	KO	OEC	0.0669486
														6	18	CTRL	0.0864045			19	8	KO	OEC	0.0623847
														6	19	CTRL	0.0835165			19	9	KO	OEC	0.0495287
														6	20	CTRL	0.0751605			19	10	KO	OEC	0.0499023
														6	21	CTRL	0.0783326			19	11	KO	OEC	0.0957115
														6	22	CTRL	0.0875174			19	12	KO	OEC	0.0705833
														6	23	CTRL	0.15124			19	13	KO	OEC	0.0750017
														6	24	CTRL	0.0747403			19	14	KO	OEC	0.0938553
														6	25	CTRL	0.0695932			19	15	KO	OEC	0.0662494
														6	26	CTRL	0.0686036			19	16	KO	OEC	0.0624577
														6	27	CTRL	0.0732476			19	17	KO	OEC	0.0833426
														6	28	CTRL	0.062286			19	18	KO	OEC	0.0571778
														6	29	CTRL	0.0618492			19	19	KO	OEC	0.0626175
														6	30	CTRL	0.080248			19	20	KO	OEC	0.0669522
														6	31	CTRL	0.0835508			19	21	KO	OEC	0.0510582
														6	32	CTRL	0.058933			19	22	KO	OEC	0.0614499
														6	33	CTRL	0.0659937			19	23	KO	OEC	0.0590784
														6	34	CTRL	0.0707447			19	24	KO	OEC	0.0655742
														6	35	CTRL	0.0514062			19	25	KO	OEC	0.064584
														6	36	CTRL	0.0586113			19	26	KO	OEC	0.0659763
														6	37	CTRL	0.0729776			20	1	KO	OEC	0.0980017
														6	38	CTRL	0.0828591			20	2	KO	OEC	0.0861512
														6	39	CTRL	0.0828668			20	3	KO	OEC	0.0871297
														7	1	CTRL	0.145075			20	4	KO	OEC	0.0677743
														7	2	CTRL	0.139992			20	5	KO	OEC	0.0660102
														7	3	CTRL	0.127147			20	6	KO	OEC	0.0504153
														7	4	CTRL	0.124704			20	7	KO	OEC	0.0565164
														7	5	CTRL	0.163448			20	8	KO	OEC	0.0578489
														7	6	CTRL	0.136655			20	9	KO	OEC	0.0809032
														7	7	CTRL	0.170262			20	10	KO	OEC	0.0726761
														7	8	CTRL	0.153335			20	11	KO	OEC	0.0713709
														7	9	CTRL	0.157386			20	12	KO	OEC	0.0612796
														7	10	CTRL	0.142182			20	13	KO	OEC	0.0799798
														7	11	CTRL	0.109043			20	14	KO	OEC	0.082486
														7	12	CTRL	0.108945			20	15	KO	OEC	0.0738599
														7	13	CTRL	0.164126			20	16	KO	OEC	0.0754771
														7	14	CTRL	0.139595			20	17	KO	OEC	0.0557946
														7	15	CTRL	0.121401			20	18	KO	OEC	0.0697514
														8	1	CTRL	0.153253			20	19	KO	OEC	0.0838244
														8	2	CTRL	0.177187			20	20	KO	OEC	0.084567
														8	3	CTRL	0.112242			20	21	KO	OEC	0.0688387
														8	4	CTRL	0.0816693			20	22	KO	OEC	0.057344
														8	5	CTRL	0.109248			20	23	KO	OEC	0.0586989
														8	6	CTRL	0.120838			20	24	KO	OEC	0.0601703
														8	7	CTRL	0.10624			20	25	KO	OEC	0.0665731
														8	8	CTRL	0.0920819			20	26	KO	OEC	0.0869518
														8	9	CTRL	0.106042			20	27	KO	OEC	0.052017
														8	10	CTRL	0.0979682			20	28	KO	OEC	0.0960529
														8	11	CTRL	0.108571			20	29	KO	OEC	0.0915927
														8	12	CTRL	0.0831525			20	30	KO	OEC	0.0789809
														8	13	CTRL	0.0796534			20	31	KO	OEC	0.0518866
														8	14	CTRL	0.0939835			20	32	KO	OEC	0.0665671
														8	15	CTRL	0.0998715			20	33	KO	OEC	0.0651338
														8	16	CTRL	0.0885537			20	34	KO	OEC	0.0782953
														8	17	CTRL	0.102737			21	1	KO	OEM	0.0768508
														8	18	CTRL	0.141054			21	2	KO	OEM	0.0530482
														8	19	CTRL	0.175625			21	3	KO	OEM	0.0718788
														8	20	CTRL	0.110495			21	4	KO	OEM	0.0819716
														9	1	CTRL	0.12497			21	5	KO	OEM	0.0820623
														9	2	CTRL	0.113451			21	6	KO	OEM	0.0715082
														9	3	CTRL	0.147686			21	7	KO	OEM	0.0692694
														9	4	CTRL	0.110492			21	8	KO	OEM	0.0748845
														9	5	CTRL	0.111706			21	9	KO	OEM	0.125087
														9	6	CTRL	0.0896629			21	10	KO	OEM	0.0941997
														9	7	CTRL	0.0865325			21	11	KO	OEM	0.0456391
														9	8	CTRL	0.0771912			21	12	KO	OEM	0.101443
														9	9	CTRL	0.100802			21	13	KO	OEM	0.0645911
														9	10	CTRL	0.0793895			21	14	KO	OEM	0.0732434
														9	11	CTRL	0.12653			21	15	KO	OEM	0.0549859
														9	12	CTRL	0.120492			21	16	KO	OEM	0.0761353
														9	13	CTRL	0.10116			21	17	KO	OEM	0.068355
														9	14	CTRL	0.0920767			21	18	KO	OEM	0.0828584
														9	15	CTRL	0.140429			21	19	KO	OEM	0.0885623
														9	16	CTRL	0.0925302			21	20	KO	OEM	0.0641803
														9	17	CTRL	0.11687			22	1	KO	OEM	0.0974266
														9	18	CTRL	0.0917786			22	2	KO	OEM	0.122314
														9	19	CTRL	0.0920522			22	3	KO	OEM	0.118857
														9	20	CTRL	0.126461			22	4	KO	OEM	0.0840963
														9	21	CTRL	0.128382			22	5	KO	OEM	0.0785463
														9	22	CTRL	0.208394			22	6	KO	OEM	0.0860365
														9	23	CTRL	0.221186			22	7	KO	OEM	0.0893219
														10	1	CTRL	0.103931			22	8	KO	OEM	0.104919
														10	2	CTRL	0.11079			22	9	KO	OEM	0.108838
														10	3	CTRL	0.0875284			22	10	KO	OEM	0.101394
														10	4	CTRL	0.0986553			22	11	KO	OEM	0.133184
														10	5	CTRL	0.0802387			22	12	KO	OEM	0.124155
														10	6	CTRL	0.0828276			23	1	KO	OEM	0.0811706
														10	7	CTRL	0.0854236			23	2	KO	OEM	0.0707981
														10	8	CTRL	0.0985101			23	3	KO	OEM	0.0879615
														10	9	CTRL	0.0997541			23	4	KO	OEM	0.0982261
														10	10	CTRL	0.106349			23	5	KO	OEM	0.0726666
														10	11	CTRL	0.0726331			23	6	KO	OEM	0.0835935
														10	12	CTRL	0.0964292			23	7	KO	OEM	0.0937529
														10	13	CTRL	0.0873122			23	8	KO	OEM	0.0845566
														10	14	CTRL	0.0848271			23	9	KO	OEM	0.0757312
														10	15	CTRL	0.0822605			23	10	KO	OEM	0.0742155
														10	16	CTRL	0.0953013			23	11	KO	OEM	0.0609202
														10	17	CTRL	0.0794359			23	12	KO	OEM	0.107916
														10	18	CTRL	0.0676566			23	13	KO	OEM	0.0674311
														10	19	CTRL	0.0881208			23	14	KO	OEM	0.0997649
														10	20	CTRL	0.0837047			23	15	KO	OEM	0.0686688
														10	21	CTRL	0.0751971			23	16	KO	OEM	0.146738
														10	22	CTRL	0.067789			23	17	KO	OEM	0.0715923
														10	23	CTRL	0.0723918			23	18	KO	OEM	0.0872279
														10	24	CTRL	0.0842814			23	19	KO	OEM	0.0758935
														10	25	CTRL	0.0708012			23	20	KO	OEM	0.10657
														10	26	CTRL	0.0729121			23	21	KO	OEM	0.102317
														10	27	CTRL	0.0704001			23	22	KO	OEM	0.087714
														10	28	CTRL	0.110112			23	23	KO	OEM	0.102273
														10	29	CTRL	0.0723511			23	24	KO	OEM	0.0895284
														10	30	CTRL	0.0996541			23	25	KO	OEM	0.0978973
														10	31	CTRL	0.102939			23	26	KO	OEM	0.0902418
														10	32	CTRL	0.0900908			23	27	KO	OEM	0.101303
														10	33	CTRL	0.0820069			23	28	KO	OEM	0.0876807
														10	34	CTRL	0.0731775			24	1	KO	OEM	0.0988913
														10	35	CTRL	0.0810032			24	2	KO	OEM	0.125157
														10	36	CTRL	0.0521363			24	3	KO	OEM	0.0781127
														10	37	CTRL	0.0602206			24	4	KO	OEM	0.131646
														10	38	CTRL	0.0761504			24	5	KO	OEM	0.10003
														10	39	CTRL	0.0875622			24	6	KO	OEM	0.144576
														10	40	CTRL	0.068931			24	7	KO	OEM	0.0796545
														10	41	CTRL	0.0616128			24	8	KO	OEM	0.0851696
														41	1	KO1	0.12201			24	9	KO	OEM	0.0631351
														41	2	KO1	0.158767			24	10	KO	OEM	0.0930294
														41	3	KO1	0.24906			24	11	KO	OEM	0.08703
														41	4	KO1	0.136416			24	12	KO	OEM	0.103617
														41	5	KO1	0.184145			24	13	KO	OEM	0.17908
														41	6	KO1	0.182338			24	14	KO	OEM	0.108846
														41	7	KO1	0.148884			24	15	KO	OEM	0.0817992
														41	8	KO1	0.183486			25	1	KO	OEM	0.0726824
														41	9	KO1	0.191936			25	2	KO	OEM	0.106135
														41	10	KO1	0.158772			25	3	KO	OEM	0.08841
														41	11	KO1	0.21325			25	4	KO	OEM	0.0861425
														41	12	KO1	0.17557			25	5	KO	OEM	0.0808705
														41	13	KO1	0.182928			25	6	KO	OEM	0.0774298
														41	14	KO1	0.104244			25	7	KO	OEM	0.0567828
														42	1	KO1	0.116234			25	8	KO	OEM	0.0846489
														42	2	KO1	0.108281			25	9	KO	OEM	0.0767248
														42	3	KO1	0.225647			25	10	KO	OEM	0.0842783
														42	4	KO1	0.128809			25	11	KO	OEM	0.0612274
														42	5	KO1	0.193113			25	12	KO	OEM	0.0706001
														42	6	KO1	0.200397			25	13	KO	OEM	0.0857466
														42	7	KO1	0.279432			25	14	KO	OEM	0.103338
														42	8	KO1	0.260623			25	15	KO	OEM	0.120256
														42	9	KO1	0.200738			25	16	KO	OEM	0.0817907
														42	10	KO1	0.281947			25	17	KO	OEM	0.0598576
														42	11	KO1	0.182396			25	18	KO	OEM	0.0917062
														42	12	KO1	0.196869			25	19	KO	OEM	0.0718382
														43	1	KO1	0.0924208			25	20	KO	OEM	0.0624941
														43	2	KO1	0.182734			26	1	KO	OEM	0.146871
														43	3	KO1	0.196311			26	2	KO	OEM	0.0767692
														43	4	KO1	0.187891			26	3	KO	OEM	0.0659696
														43	5	KO1	0.178537			26	4	KO	OEM	0.0555882
														43	6	KO1	0.168933			26	5	KO	OEM	0.0747712
														43	7	KO1	0.151963			26	6	KO	OEM	0.0569946
														43	8	KO1	0.163524			26	7	KO	OEM	0.0721659
														43	9	KO1	0.136115			26	8	KO	OEM	0.0759092
														43	10	KO1	0.12306			26	9	KO	OEM	0.0993093
														43	11	KO1	0.199949			26	10	KO	OEM	0.089496
														43	12	KO1	0.161109			26	11	KO	OEM	0.0820806
														43	13	KO1	0.172369			26	12	KO	OEM	0.0821133
														44	1	KO1	0.161315			26	13	KO	OEM	0.0636688
														44	2	KO1	0.141384			26	14	KO	OEM	0.0620116
														44	3	KO1	0.387209			26	15	KO	OEM	0.0562546
														44	4	KO1	0.243191			26	16	KO	OEM	0.0655161
														44	5	KO1	0.229272			26	17	KO	OEM	0.0838186
														44	6	KO1	0.293504			26	18	KO	OEM	0.125576
														44	7	KO1	0.198931			27	1	KO	OEM	0.0950831
														44	8	KO1	0.197051			27	2	KO	OEM	0.109581
														44	9	KO1	0.212009			27	3	KO	OEM	0.111023
														44	10	KO1	0.168113			27	4	KO	OEM	0.128505
														44	11	KO1	0.183283			27	5	KO	OEM	0.1166
														44	12	KO1	0.142314			27	6	KO	OEM	0.103029
														44	13	KO1	0.154904			27	7	KO	OEM	0.093235
														44	14	KO1	0.152449			27	8	KO	OEM	0.115046
														44	15	KO1	0.221767			27	9	KO	OEM	0.141283
														44	16	KO1	0.253075			27	10	KO	OEM	0.0827099
														44	17	KO1	0.246512			27	11	KO	OEM	0.138709
														44	18	KO1	0.175313			27	12	KO	OEM	0.0932254
														45	1	KO1	0.194512			27	13	KO	OEM	0.103499
														45	2	KO1	0.221642			27	14	KO	OEM	0.0949662
														45	3	KO1	0.215937			27	15	KO	OEM	0.100998
														45	4	KO1	0.113381			27	16	KO	OEM	0.0798645
														45	5	KO1	0.177615			27	17	KO	OEM	0.0789796
														45	6	KO1	0.156599			27	18	KO	OEM	0.0849711
														45	7	KO1	0.141856			27	19	KO	OEM	0.09684
														45	8	KO1	0.0794685			27	20	KO	OEM	0.108221
														45	9	KO1	0.231161			27	21	KO	OEM	0.0974924
														45	10	KO1	0.240798			28	1	KO	OEM	0.0879838
														45	11	KO1	0.270711			28	2	KO	OEM	0.0792087
														45	12	KO1	0.130117			28	3	KO	OEM	0.0722198
														46	1	KO1	0.173881			28	4	KO	OEM	0.0919515
														46	2	KO1	0.172502			28	5	KO	OEM	0.103174
														46	3	KO1	0.272564			28	6	KO	OEM	0.128737
														46	4	KO1	0.231468			28	7	KO	OEM	0.107045
														46	5	KO1	0.273782			28	8	KO	OEM	0.0741103
														46	6	KO1	0.234362			28	9	KO	OEM	0.103298
														46	7	KO1	0.17274			28	10	KO	OEM	0.10445
														46	8	KO1	0.205532			28	11	KO	OEM	0.106559
														46	9	KO1	0.208995			28	12	KO	OEM	0.14044
														46	10	KO1	0.196804			28	13	KO	OEM	0.0778577
														46	11	KO1	0.30222			28	14	KO	OEM	0.116178
														46	12	KO1	0.190353			28	15	KO	OEM	0.0753904
														46	13	KO1	0.161527			28	16	KO	OEM	0.104037
														47	1	KO1	0.124325			28	17	KO	OEM	0.0912516
														47	2	KO1	0.149611			28	18	KO	OEM	0.075609
														47	3	KO1	0.168055			28	19	KO	OEM	0.0726388
														47	4	KO1	0.105745			28	20	KO	OEM	0.053064
														47	5	KO1	0.119613			28	21	KO	OEM	0.0664087
														47	6	KO1	0.269025			28	22	KO	OEM	0.0598279
														47	7	KO1	0.328528			28	23	KO	OEM	0.122417
														47	8	KO1	0.206979			28	24	KO	OEM	0.099827
														47	9	KO1	0.125366			28	25	KO	OEM	0.113236
														47	10	KO1	0.0989292			28	26	KO	OEM	0.0810567
														47	11	KO1	0.14893			28	27	KO	OEM	0.051742
														47	12	KO1	0.155			28	28	KO	OEM	0.0907276
														47	13	KO1	0.0899643			28	29	KO	OEM	0.079242
														47	14	KO1	0.12657			29	1	KO	OEM	0.0747861
														47	15	KO1	0.119041			29	2	KO	OEM	0.10698
														47	16	KO1	0.113927			29	3	KO	OEM	0.0991937
														47	17	KO1	0.127222			29	4	KO	OEM	0.0709652
														47	18	KO1	0.0780718			29	5	KO	OEM	0.110812
														47	19	KO1	0.126429			29	6	KO	OEM	0.0870836
														47	20	KO1	0.104888			29	7	KO	OEM	0.104596
														48	1	KO1	0.174721			29	8	KO	OEM	0.0588216
														48	2	KO1	0.203689			29	9	KO	OEM	0.105264
														48	3	KO1	0.171496			29	10	KO	OEM	0.0960228
														48	4	KO1	0.178251			29	11	KO	OEM	0.0775603
														48	5	KO1	0.20751			29	12	KO	OEM	0.0893806
														48	6	KO1	0.135713			29	13	KO	OEM	0.11628
														48	7	KO1	0.143091			29	14	KO	OEM	0.0941474
														48	8	KO1	0.164927			29	15	KO	OEM	0.0739062
														48	9	KO1	0.17659			29	16	KO	OEM	0.0532238
														48	10	KO1	0.186179			29	17	KO	OEM	0.0848056
														48	11	KO1	0.144308			29	18	KO	OEM	0.0809978
														48	12	KO1	0.196661			29	19	KO	OEM	0.0811016
														48	13	KO1	0.181663			29	20	KO	OEM	0.0955179
														48	14	KO1	0.175489			29	21	KO	OEM	0.108806
														48	15	KO1	0.17021			29	22	KO	OEM	0.0652844
														49	1	KO1	0.188778			29	23	KO	OEM	0.116913
														49	2	KO1	0.261852			29	24	KO	OEM	0.09318
														49	3	KO1	0.220913			29	25	KO	OEM	0.111164
														49	4	KO1	0.215645			29	26	KO	OEM	0.12385
														49	5	KO1	0.131935			29	27	KO	OEM	0.0842425
														49	6	KO1	0.225471			29	28	KO	OEM	0.0969196
														49	7	KO1	0.161019			29	29	KO	OEM	0.111985
														49	8	KO1	0.113002			29	30	KO	OEM	0.105064
														49	9	KO1	0.145722			29	31	KO	OEM	0.0867638
														49	10	KO1	0.213406			29	32	KO	OEM	0.10975
														50	1	KO1	0.221766			29	33	KO	OEM	0.0984723
														50	2	KO1	0.173083			29	34	KO	OEM	0.0878051
														50	3	KO1	0.179885			29	35	KO	OEM	0.0691257
														50	4	KO1	0.197093			30	1	KO	OEM	0.0626493
														50	5	KO1	0.151009			30	2	KO	OEM	0.0728154
														50	6	KO1	0.135955			30	3	KO	OEM	0.0676887
														50	7	KO1	0.135176			30	4	KO	OEM	0.0912658
														50	8	KO1	0.136441			30	5	KO	OEM	0.0853018
														50	9	KO1	0.148287			30	6	KO	OEM	0.0921651
														50	10	KO1	0.163224			30	7	KO	OEM	0.07253
														50	11	KO1	0.171917			30	8	KO	OEM	0.0467563
														50	12	KO1	0.148384			30	9	KO	OEM	0.045711
														50	13	KO1	0.160363			30	10	KO	OEM	0.0595822
														50	14	KO1	0.164697			30	11	KO	OEM	0.0535478
														50	15	KO1	0.169697			30	12	KO	OEM	0.0725116
														50	16	KO1	0.172244			30	13	KO	OEM	0.086648
														50	17	KO1	0.193096			30	14	KO	OEM	0.0740265
														50	18	KO1	0.0790437			30	15	KO	OEM	0.091145
														50	19	KO1	0.128094			30	16	KO	OEM	0.107975
														50	20	KO1	0.137556			30	17	KO	OEM	0.120844
														50	21	KO1	0.160228			30	18	KO	OEM	0.0923896
														50	22	KO1	0.177812			30	19	KO	OEM	0.119345
														50	23	KO1	0.13694			30	20	KO	OEM	0.0890246
														50	24	KO1	0.227837			30	21	KO	OEM	0.0986154
														50	25	KO1	0.191799			30	22	KO	OEM	0.0884578
														50	26	KO1	0.119876			30	23	KO	OEM	0.071433
														50	27	KO1	0.195028			31	1	KO	OEW	0.0655524
														50	28	KO1	0.185226			31	2	KO	OEW	0.0429857
														50	29	KO1	0.169939			31	3	KO	OEW	0.0680025
														50	30	KO1	0.19194			31	4	KO	OEW	0.0703917
														50	31	KO1	0.148109			31	5	KO	OEW	0.0761102
														50	32	KO1	0.150525			31	6	KO	OEW	0.0571592
														50	33	KO1	0.170035			31	7	KO	OEW	0.06407
														50	34	KO1	0.194414			31	8	KO	OEW	0.0581148
														50	35	KO1	0.150148			31	9	KO	OEW	0.0684027
														50	36	KO1	0.0991755			31	10	KO	OEW	0.0708114
														50	37	KO1	0.13217			31	11	KO	OEW	0.0739801
														50	38	KO1	0.196799			31	12	KO	OEW	0.0553205
														50	39	KO1	0.182842			31	13	KO	OEW	0.0687581
																				31	14	KO	OEW	0.045941
																				31	15	KO	OEW	0.0531422
																				31	16	KO	OEW	0.062576
																				31	17	KO	OEW	0.0463068
																				32	1	KO	OEW	0.0823576
																				32	2	KO	OEW	0.0751281
																				32	3	KO	OEW	0.0689098
																				32	4	KO	OEW	0.0796599
																				32	5	KO	OEW	0.056073
																				32	6	KO	OEW	0.0656017
																				32	7	KO	OEW	0.0471903
																				32	8	KO	OEW	0.0457828
																				32	9	KO	OEW	0.0515151
																				32	10	KO	OEW	0.0686648
																				32	11	KO	OEW	0.0565444
																				32	12	KO	OEW	0.068248
																				32	13	KO	OEW	0.0540488
																				32	14	KO	OEW	0.047654
																				32	15	KO	OEW	0.0775258
																				32	16	KO	OEW	0.0750969
																				32	17	KO	OEW	0.0586485
																				32	18	KO	OEW	0.0688386
																				32	19	KO	OEW	0.0464622
																				32	20	KO	OEW	0.0697255
																				33	1	KO	OEW	0.0384481
																				33	2	KO	OEW	0.0347549
																				33	3	KO	OEW	0.062488
																				33	4	KO	OEW	0.0512526
																				33	5	KO	OEW	0.0562969
																				33	6	KO	OEW	0.0772388
																				33	7	KO	OEW	0.0638425
																				33	8	KO	OEW	0.0560729
																				33	9	KO	OEW	0.0571259
																				33	10	KO	OEW	0.055993
																				33	11	KO	OEW	0.0828498
																				33	12	KO	OEW	0.0717197
																				33	13	KO	OEW	0.069138
																				33	14	KO	OEW	0.0621759
																				33	15	KO	OEW	0.0566843
																				33	16	KO	OEW	0.0508025
																				33	17	KO	OEW	0.0581615
																				33	18	KO	OEW	0.0796485
																				33	19	KO	OEW	0.0536026
																				33	20	KO	OEW	0.0678369
																				33	21	KO	OEW	0.0783565
																				33	22	KO	OEW	0.0629181
																				33	23	KO	OEW	0.0614288
																				33	24	KO	OEW	0.0666677
																				33	25	KO	OEW	0.0667677
																				33	26	KO	OEW	0.0715918
																				33	27	KO	OEW	0.0534786
																				33	28	KO	OEW	0.0627467
																				33	29	KO	OEW	0.0675195
																				33	30	KO	OEW	0.0763228
																				33	31	KO	OEW	0.0808012
																				33	32	KO	OEW	0.0520645
																				34	1	KO	OEW	0.059858
																				34	2	KO	OEW	0.0603058
																				34	3	KO	OEW	0.0502652
																				34	4	KO	OEW	0.0822524
																				34	5	KO	OEW	0.077368
																				34	6	KO	OEW	0.0637269
																				34	7	KO	OEW	0.0729604
																				34	8	KO	OEW	0.0679031
																				34	9	KO	OEW	0.049221
																				34	10	KO	OEW	0.0521943
																				34	11	KO	OEW	0.0739974
																				34	12	KO	OEW	0.0764757
																				34	13	KO	OEW	0.0773529
																				34	14	KO	OEW	0.0691681
																				34	15	KO	OEW	0.0841023
																				34	16	KO	OEW	0.0491117
																				34	17	KO	OEW	0.0650251
																				34	18	KO	OEW	0.0587155
																				34	19	KO	OEW	0.0470859
																				34	20	KO	OEW	0.0597849
																				34	21	KO	OEW	0.0557411
																				34	22	KO	OEW	0.0502826
																				34	23	KO	OEW	0.0410627
																				34	24	KO	OEW	0.0772732
																				34	25	KO	OEW	0.0603993
																				34	26	KO	OEW	0.0477249
																				34	27	KO	OEW	0.0469097
																				34	28	KO	OEW	0.0527551
																				34	29	KO	OEW	0.0449859
																				35	1	KO	OEW	0.0622775
																				35	2	KO	OEW	0.0619158
																				35	3	KO	OEW	0.0581305
																				35	4	KO	OEW	0.0450601
																				35	5	KO	OEW	0.0578425
																				35	6	KO	OEW	0.0509391
																				35	7	KO	OEW	0.0433649
																				35	8	KO	OEW	0.0727126
																				35	9	KO	OEW	0.0376868
																				35	10	KO	OEW	0.0561928
																				35	11	KO	OEW	0.0501848
																				35	12	KO	OEW	0.0545716
																				35	13	KO	OEW	0.046645
																				35	14	KO	OEW	0.0378218
																				35	15	KO	OEW	0.0457264
																				35	16	KO	OEW	0.0518414
																				35	17	KO	OEW	0.073172
																				35	18	KO	OEW	0.0632666
																				35	19	KO	OEW	0.0621323
																				35	20	KO	OEW	0.0520111
																				35	21	KO	OEW	0.0745637
																				35	22	KO	OEW	0.0844504
																				35	23	KO	OEW	0.0736113
																				35	24	KO	OEW	0.065482
																				35	25	KO	OEW	0.0504102
																				35	26	KO	OEW	0.0799254
																				35	27	KO	OEW	0.0536181
																				35	28	KO	OEW	0.0552145
																				35	29	KO	OEW	0.0490177
																				35	30	KO	OEW	0.0716741
																				35	31	KO	OEW	0.0554723
																				35	32	KO	OEW	0.036463
																				35	33	KO	OEW	0.0628032
																				35	34	KO	OEW	0.0564379
																				35	35	KO	OEW	0.0579058
																				35	36	KO	OEW	0.0504794
																				36	1	KO	OEW	0.064136
																				36	2	KO	OEW	0.027223
																				36	3	KO	OEW	0.0376418
																				36	4	KO	OEW	0.0419239
																				36	5	KO	OEW	0.0600319
																				36	6	KO	OEW	0.0441245
																				36	7	KO	OEW	0.051046
																				36	8	KO	OEW	0.0607923
																				36	9	KO	OEW	0.0654622
																				36	10	KO	OEW	0.0557419
																				36	11	KO	OEW	0.0601602
																				36	12	KO	OEW	0.0423764
																				36	13	KO	OEW	0.0466379
																				36	14	KO	OEW	0.0534028
																				36	15	KO	OEW	0.0527815
																				36	16	KO	OEW	0.0531383
																				36	17	KO	OEW	0.040378
																				36	18	KO	OEW	0.0528403
																				36	19	KO	OEW	0.0476407
																				36	20	KO	OEW	0.0386597
																				36	21	KO	OEW	0.0460032
																				36	22	KO	OEW	0.0385045
																				36	23	KO	OEW	0.043831
																				36	24	KO	OEW	0.0506211
																				36	25	KO	OEW	0.0492425
																				36	26	KO	OEW	0.0562927
																				36	27	KO	OEW	0.0475794
																				37	1	KO	OEW	0.0464806
																				37	2	KO	OEW	0.0539108
																				37	3	KO	OEW	0.068825
																				37	4	KO	OEW	0.0517845
																				37	5	KO	OEW	0.0517224
																				37	6	KO	OEW	0.0653383
																				37	7	KO	OEW	0.0430212
																				37	8	KO	OEW	0.0477233
																				37	9	KO	OEW	0.049395
																				37	10	KO	OEW	0.0518986
																				37	11	KO	OEW	0.0430987
																				37	12	KO	OEW	0.04274
																				37	13	KO	OEW	0.0477762
																				37	14	KO	OEW	0.0495717
																				37	15	KO	OEW	0.0445243
																				37	16	KO	OEW	0.0518651
																				37	17	KO	OEW	0.0622299
																				37	18	KO	OEW	0.0606341
																				37	19	KO	OEW	0.0569722
																				37	20	KO	OEW	0.0958568
																				37	21	KO	OEW	0.0684329
																				37	22	KO	OEW	0.0327447
																				37	23	KO	OEW	0.0388223
																				37	24	KO	OEW	0.0453529
																				37	25	KO	OEW	0.0488542
																				37	26	KO	OEW	0.0510013
																				37	27	KO	OEW	0.0431832
																				38	1	KO	OEW	0.0400553
																				38	2	KO	OEW	0.0506253
																				38	3	KO	OEW	0.0667246
																				38	4	KO	OEW	0.0661668
																				38	5	KO	OEW	0.0607377
																				38	6	KO	OEW	0.0588294
																				38	7	KO	OEW	0.0570783
																				38	8	KO	OEW	0.0645197
																				38	9	KO	OEW	0.0616896
																				38	10	KO	OEW	0.0611274
																				38	11	KO	OEW	0.0547715
																				38	12	KO	OEW	0.0634823
																				38	13	KO	OEW	0.0773396
																				38	14	KO	OEW	0.062134
																				38	15	KO	OEW	0.0525022
																				38	16	KO	OEW	0.0611931
																				38	17	KO	OEW	0.0425843
																				38	18	KO	OEW	0.0436611
																				38	19	KO	OEW	0.0569332
																				38	20	KO	OEW	0.0392873
																				38	21	KO	OEW	0.0484144
																				38	22	KO	OEW	0.0493301
																				38	23	KO	OEW	0.0525657
																				38	24	KO	OEW	0.0413615
																				38	25	KO	OEW	0.0393172
																				38	26	KO	OEW	0.0470993
																				38	27	KO	OEW	0.0365591
																				38	28	KO	OEW	0.0399381
																				38	29	KO	OEW	0.0697515
																				38	30	KO	OEW	0.0630152
																				38	31	KO	OEW	0.0608235
																				38	32	KO	OEW	0.0651397
																				38	33	KO	OEW	0.0508552
																				38	34	KO	OEW	0.0625753
																				38	35	KO	OEW	0.0576233
																				38	36	KO	OEW	0.0493974
																				38	37	KO	OEW	0.0513994
																				38	38	KO	OEW	0.0563721
																				38	39	KO	OEW	0.0511743
																				38	40	KO	OEW	0.0652061
																				38	41	KO	OEW	0.0481891
																				38	42	KO	OEW	0.0581575
																				38	43	KO	OEW	0.0540085
																				39	1	KO	OEW	0.078644
																				39	2	KO	OEW	0.0634532
																				39	3	KO	OEW	0.0450792
																				39	4	KO	OEW	0.0711719
																				39	5	KO	OEW	0.0607186
																				39	6	KO	OEW	0.0491613
																				39	7	KO	OEW	0.0477973
																				39	8	KO	OEW	0.0601786
																				39	9	KO	OEW	0.0501581
																				39	10	KO	OEW	0.0723685
																				39	11	KO	OEW	0.0658818
																				39	12	KO	OEW	0.0578157
																				39	13	KO	OEW	0.0684441
																				39	14	KO	OEW	0.049251
																				39	15	KO	OEW	0.0533952
																				39	16	KO	OEW	0.0646746
																				39	17	KO	OEW	0.055577
																				39	18	KO	OEW	0.0667416
																				39	19	KO	OEW	0.060982
																				39	20	KO	OEW	0.0810249
																				39	21	KO	OEW	0.0594041
																				39	22	KO	OEW	0.0542736
																				39	23	KO	OEW	0.0524167
																				39	24	KO	OEW	0.0703957
																				39	25	KO	OEW	0.0618799
																				39	26	KO	OEW	0.0544925
																				39	27	KO	OEW	0.0575559
																				39	28	KO	OEW	0.0553666
																				40	1	KO	OEW	0.0761197
																				40	2	KO	OEW	0.0785703
																				40	3	KO	OEW	0.105742
																				40	4	KO	OEW	0.0949954
																				40	5	KO	OEW	0.0605098
																				40	6	KO	OEW	0.0980415
																				40	7	KO	OEW	0.0687341
																				40	8	KO	OEW	0.0621534
																				40	9	KO	OEW	0.0832975
																				40	10	KO	OEW	0.0782053
																				40	11	KO	OEW	0.0919851
																				40	12	KO	OEW	0.0942343
																				40	13	KO	OEW	0.0793078
																				40	14	KO	OEW	0.0648052
																				40	15	KO	OEW	0.08438
																				40	16	KO	OEW	0.0772836
																				40	17	KO	OEW	0.0781433
																				40	18	KO	OEW	0.0765738
																				40	19	KO	OEW	0.0937975
																				40	20	KO	OEW	0.107035
																				40	21	KO	OEW	0.0874174
																				40	22	KO	OEW	0.0736855
																				40	23	KO	OEW	0.082757
																				40	24	KO	OEW	0.0959727
																				40	25	KO	OEW	0.0756154
																				40	26	KO	OEW	0.0551389
																				40	27	KO	OEW	0.0749656
																				40	28	KO	OEW	0.0566188
																				40	29	KO	OEW	0.0713515
																				40	30	KO	OEW	0.0721318
																				40	31	KO	OEW	0.0605837
																				40	32	KO	OEW	0.0693739
																				40	33	KO	OEW	0.0880737
																				40	34	KO	OEW	0.0983448
																				40	35	KO	OEW	0.0442097
																				40	36	KO	OEW	0.0655075
																				40	37	KO	OEW	0.074687
																				40	38	KO	OEW	0.0929071
																				40	39	KO	OEW	0.0833825
																				40	40	KO	OEW	0.0785858
																				40	41	KO	OEW	0.0928406
																				40	42	KO	OEW	0.0909742
																				40	43	KO	OEW	0.0670108

## Sheet: ED2
ED2a									ED2c
Total caRNA m5C	TET2 WT			TET2 KO
	rep1	rep2	rep3	rep1	rep2	rep3			recovery	30%			0.5			70%
	0.003123	0.002901	0.003766	0.003488	0.003319	0.003275			0	1.12958	1.03224	1.27968	0.949858	0.154511	1.25335	1.06126	0.498541	0.943297
									0.002	2.12253	2.10787	2.30663	2.25916	1.99416	2.32267	2.022	2.24355	2.21266
	Unpaired t test with Welch's correction				TET2 WT				0.02	5.48611	6.47906	5.71908	5.08337	4.61325	5.67958	6.21513	5.67958	5.92077
	P value	0.7423			vs.				0.2	10.2375	9.4859	11.5177	10.5985	11.5978	12.7797	12.6038	12.6038	14.68
	P value summary	ns			TET2 KO
	Significantly different? (P < 0.05)	No
	One- or two-tailed P value?	Two-tailed							0% m5C group		0.2% m5C group		2% m5C group		20% m5C group
	Welch-corrected t, df	t=0.3718 df=2.242							ANOVA summary		ANOVA summary		ANOVA summary		ANOVA summary
									F	0.8131	F	0.04248	F	3.001	F	5.104
									P value	0.487	P value	0.9587	P value	0.1249	P value	0.0507
ribo- caRNA m5C		WT	Tet1 KO	Tet2 KO					P value summary	ns	P value summary	ns	P value summary	ns	P value summary	ns
	rep1	0.00022	0.00012	0.00026					Are differences among means statistically significant? (P < 0.05)	No	Are differences among means statistically significant? (P < 0.05)	No	Are differences among means statistically significant? (P < 0.05)	No	Are differences among means statistically significant? (P < 0.05)	No
	rep2	0.00023	0.00013	0.00031					R square	0.2132	R square	0.01396	R square	0.5001	R square	0.6298
	rep3	0.00017	0.00018	0.00033
	Unpaired t test		Tet2 KO	Unpaired t test with Welch's correction		Tet1 KO
	P value	0.0287	vs.	P value	0.0733	vs.
	P value summary	*	WT	P value summary	ns	WT
	Significantly different? (P < 0.05)	Yes		Significantly different? (P < 0.05)	No
	One- or two-tailed P value?	Two-tailed		One- or two-tailed P value?	Two-tailed
	t, df	t=3.347 df=4		Welch-corrected t, df	t=2.413 df=4.000
gDNA 5mC		WT	Tet1 KO	Tet2 KO
	rep1	0.95708	0.58675	0.82504
	rep2	1.02449	0.68979	1.02995
	rep3	1.01898	0.61519	0.92111
	Unpaired t test with Welch's correction			Tet1 KO
	P value	0.001		vs.
	P value summary	**		WT
	Significantly different? (P < 0.05)	Yes
	One- or two-tailed P value?	Two-tailed
	Welch-corrected t, df	t=9.840 df=3.590
	Unpaired t test with Welch's correction			Tet2 KO
	P value	0.3348		vs.
	P value summary	ns		WT
	Significantly different? (P < 0.05)	No
	One- or two-tailed P value?	Two-tailed
	Welch-corrected t, df	t=1.187 df=2.524

## Sheet: ED3
ED3e
%m5C level	siNC	siNsun2	siTrdmt1
rep1	0.02789	0.01055	0.02365
rep2	0.02822	0.01102	0.02065
rep3	0.03056	0.0098	0.01698
Unpaired t test with Welch's correction			siNsun2
P value	0.0005		vs.
P value summary	***		siNC
Significantly different? (P < 0.05)	Yes
One- or two-tailed P value?	Two-tailed
Welch-corrected t, df	t=20.20 df=2.693
Trdmt1 qPCR	siNC	siRNA
rep1	0.974353	0.424112
rep2	1.04428	0.406835
rep3	0.98113	0.384889
Unpaired t test with Welch's correction		siRNA
P value	0.0002	vs.
P value summary	***	siNC
Significantly different? (P < 0.05)	Yes
One- or two-tailed P value?	Two-tailed
Welch-corrected t, df	t=23.79 df=2.973
Nsun2 qPCR	siNC	siRNA
rep1	0.95784	0.273167
rep2	1.12339	0.282801
rep3	0.944653	0.278907
Unpaired t test with Welch's correction		siRNA
P value	0.006	vs.
P value summary	**	siNC
Significantly different? (P < 0.05)	Yes
One- or two-tailed P value?	Two-tailed
Welch-corrected t, df	t=12.69 df=2.009

## Sheet: ED4
ED4b								ED4c				ED4d								ED4e								ED4f								ED4h												ED4j
Recovery	NC ASO			IAP ASO				Expression level	NC ASO	IAP ASO			NC ASO			IAP ASO					dCas13b-mut			dCas13b-WT				TUNEL signal	0	1	2	3	4	6		DNA 5mC	0	4	8	12	16	20	24	36	48	72			TET2HxDCD
	rep1	rep2	rep3	rep1	rep2	rep3		rep1	0.965936	0.858565			rep1	rep2	rep3	rep1	rep2	rep3		Time (h)	rep1	rep2	rep3	rep1	rep2	rep3		image1	0.285725	0.302865	0.236431	0.234747	0.310238	0.52811		rep1	0.01193	0.01107	0.01111	0.01147	0.01141	0.01201	0.01289	0.01258	0.01397	0.01423		rep1	1.0207
amplicon2	1.56917	1.56917	1.6358	1.05702	1.07923	1.02811		rep2	1.01396	0.823591		IAP	0.9521	0.8562	1.1256	0.599	0.6254	0.7095		0	1	1	1	1	1	1		image2	0.315071	0.320516	0.21244	0.362717	0.237824	0.592128		rep2	0.01237	0.0122	0.01207	0.01116	0.01157	0.0129	0.01237	0.0137	0.01421	0.01489		rep2	1.01365
amplicon3	1.11729	1.13288	1.12506	0.817902	0.846745	0.852635		rep3	1.04972	0.876606		Hoxd13	0.9065	1.0384	0.8805	0.8987	0.7766	1.0671		4	5.71399	6.88971	5.92501	13.0767	12.1426	10.1071		image3	0.312406	0.378752	0.227079	0.33818	0.190767	0.539622		rep3	0.01149	0.012	0.01227	0.01214	0.01163	0.01281	0.0114	0.01336	0.01417	0.01502		rep3	0.965637
amplicon4	0.846745	0.895025	0.882703	0.726986	0.742262	0.742262														8	21.2721	21.5747	24.8377	13.1085	15.2654	11.9827		image4	0.263542	0.229292	0.540604	0.420253	0.418884	0.763756
amplicon5	1.37554	1.27456	1.19748	0.97942	0.972655	1		Unpaired t test with Welch's correction		IAP ASO		Unpaired t test			IAP NC ASO					12	22.5148	17.5739	20.297	11.5882	8.74088	14.918		image5	0.220613	0.249201	0.442057	0.431348	0.45581	0.315808		Unpaired t test with Welch's correction												Unpaired t test with Welch's correction
amplicon1	8.28212	8.28212	8	1.91853	1.79005	1.85318		P value	0.0087	vs.		P value	0.0176		vs.					16	16.4534	15.4133	21.226	10.4518	9.08904	18.9617		image6	0.376987	0.378342	0.331028	0.339409	0.570205	0.397912		Time		0.708	0.809	0.428	0.258	0.167	0.604	0.041	0.0088	0.0014		P value	0.0051
								P value summary	**	NC ASO		P value summary	*		IAP IAP ASO					20	18.791	19.9899	11.9612	13.3839	13.6624	11.5164		image7	0.194806	0.45237	0.240233	0.415684	0.397346	0.324154		vs.												P value summary	**
	Multiple t tests	NC ASO						Significantly different? (P < 0.05)	Yes			Significantly different? (P < 0.05)	Yes							24	12.9721	9.90958	10.5753	15.5794	13.9634	9.45576		image8	0.28998	0.348998	0.44347	0.255514	0.189298	0.268839		0hr												Significantly different? (P < 0.05)	Yes
	P value	vs.						One- or two-tailed P value?	Two-tailed			One- or two-tailed P value?	Two-tailed							36	13.3183	13.3346	12.6629	24.5147	26.1675	18.3021																						One- or two-tailed P value?	Two-tailed
amplicon2	< 0.0001	IAP ASO						Welch-corrected t, df	t=5.444 df=3.407			t, df	t=3.895 df=4							48	16.0076	15.8353	17.7835	28.4903	32.1525	24.5522		Unpaired t test with Welch's correction			6hr																	Welch-corrected t, df	t=13.99 df=2.002
amplicon3	< 0.0001																			72	18.3429	15.0019	13.722	11.1408	12.715	13.4274		P value	0.018		vs.					RNA m5C	0	4	8	12	16	20	24	36	48	72
amplicon4	0.000856061											Unpaired t test			Hoxd13 NC ASO													P value summary	*		0hr					rep1	0.00055	0.000527	0.000664	0.0007	0.000741	0.000723	0.000735	0.00072	0.000741	0.000737
amplicon5	0.00462973											P value	0.7904		vs.						dCas13b-mut				dCas13b-WT			Significantly different? (P < 0.05)	Yes							rep2	0.000581	0.000572	0.00068	0.00073	0.000748	0.000747	0.000722	0.000742	0.000727	0.000738
amplicon1	< 0.0001											P value summary	ns		Hoxd13 IAP ASO					Time (h)	P value	Multiple t tests		Time (h)	P value	Multiple t tests		One- or two-tailed P value?	Two-tailed							rep3	0.000568	0.000544	0.000622	0.000704	0.000746	0.000733	0.00074	0.000737	0.000724	0.000738
												Significantly different? (P < 0.05)	No							0				0				Welch-corrected t, df	t=2.915 df=8.577
												One- or two-tailed P value?	Two-tailed							4	0.0001283	Indicated time		4	0.000251693	Indicated time										Unpaired t test with Welch's correction
												t, df	t=0.2841 df=4							8	0.000668243	vs.		8	0.000206403	vs.										Time		0.313	0.0196	0.0004	0.0016	0.0002	0.0003	0.0002	0.0004	0.0027
																				12	< 0.0001	0h		12	0.00383101	0h										vs.
																				16	0.000572271			16	0.018599											0hr
																				20	0.000990785			20	< 0.0001
																				24	< 0.0001			24	0.00281053
																				36	< 0.0001			36	0.00077997
																				48	< 0.0001			48	0.000236733
																				72	< 0.0001			72	< 0.0001
[truncated: 11 more columns]

## Sheet: ED5
ED5g
IAP	H2AK119ub			H3K27me3					MERVL	H2AK119ub			H3K27me3					LINE	H2AK119ub			H3K27me3
Time (h)	rep1	rep2	rep3	rep1	rep2	rep3			Time (h)	rep1	rep2	rep3	rep1	rep2	rep3			Time (h)	rep1	rep2	rep3	rep1	rep2	rep3
0	1	1	1	1	1	1			0	1	1	1	1	1	1			0	1	1	1	1	1	1
4	0.562529	0.540256	0.626442	0.897933	0.986233	0.965936			4	0.806642	0.812252	0.930392	0.920188	0.933033	0.959264			4	1.18093	1.13288	1.06437	0.968499	0.987903	1.01993
8	0.425939	0.443982	0.47648	0.913452	1.05831	1.08927			8	0.717858	0.772623	0.768438	1.04972	1.11247	1.08674			8	1.06894	1.14891	0.99194	1.0195	1.2093	0.997382
12	0.398539	0.473859	0.528239	0.84949	0.725599	0.798035			12	0.800322	0.829592	0.759326	0.779165	0.768438	0.710592			12	1.17837	1.01286	1.15755	0.975934	0.973377	1.00552
16	0.438593	0.429506	0.378602	0.358375	0.411936	0.428694			16	0.726859	0.71643	0.747425	0.705913	0.817902	0.840896			16	1.13506	1.03772	1.0334	0.986233	0.933092	1.22813
20	0.408292	0.470045	0.42993	0.203653	0.250032	0.228693			20	0.768943	0.840041	0.795536	0.48971	0.466516	0.486327			20	1.03527	0.986233	1.00527	0.936754	0.97942	0.893092
24	0.429247	0.387684	0.459201	0.199502	0.22859	0.24795			24	0.81593	0.73313	0.763938	0.405275	0.413596	0.453574			24	1.14674	1.04247	1.07923	0.986233	1.01396	1.12895
36	0.490683	0.549684	0.47859	0.20958	0.250179	0.26293			36	0.808048	0.732673	0.759382	0.459329	0.509403	0.463294			36	1.05702	0.902811	1.04972	0.959382	1.13594	0.93282
48	0.386682	0.435363	0.468839	0.259772	0.223375	0.286733			48	0.758192	0.834729	0.750946	0.410625	0.420959	0.469761			48	1.07923	0.935265	1.03527	0.986943	0.89262	1.01069
72	0.453395	0.432269	0.424421	0.278273	0.248932	0.255193			72	0.740186	0.791551	0.827939	0.374421	0.438303	0.460094			72	1.10702	0.921012	1.02101	0.993092	1.20186	1.02811
Multiple t tests									Multiple t tests									Multiple t tests
Time (h)	P value	Time		P value	Time				Time (h)	P value	Time		P value	Time				Time (h)	P value	Time		P value	Time
0		vs.			vs.				0		vs.			vs.				0		vs.			vs.
4	< 0.0001	0h		0.134629	0h				4	0.0204095	0h		0.00555522	0h				4	0.0203438	0h		0.626592	0h
8	< 0.0001			0.726395					8	0.000149447			0.0103687					8	0.197663			0.32505
12	0.000143711			0.00435365					12	0.000563877			0.000314537					12	0.0892437			0.218137
16	< 0.0001			< 0.0001					16	< 0.0001			0.00708656					16	0.107145			0.617022
20	< 0.0001			< 0.0001					20	0.000666004			< 0.0001					20	0.565769			0.0632267
24	< 0.0001			< 0.0001					24	0.000691428			< 0.0001					24	0.0427896			0.380282
36	< 0.0001			< 0.0001					36	0.000452812			< 0.0001					36	0.952509			0.89013
48	< 0.0001			< 0.0001					48	0.00122757			< 0.0001					48	0.716763			0.36767
72	< 0.0001			< 0.0001					72	0.00110653			< 0.0001					72	0.776186			0.313534

[truncated: 4 more sheets: ED6, ED7, ED8, ED9]
